# Supplementary material for: Identification and Characterization of circRNA in Longissimus Dorsi of Different Breeds of Cattle
Source: Front Genet. 2020 Nov 26;11:565085. doi: 10.3389/fgene.2020.565085 (PMC7726199; doi:10.3389/fgene.2020.565085)
Supplement: Supplementary file 6 [file Table_6.XLS]

## Sheet: Sheet1
miRNA_Name	circRNA_ID	Binding_Site_Number
bta-let-7a-5p	bta_circ_0014629	1
bta-let-7d	bta_circ_0014629	1
bta-let-7g	bta_circ_0004939	1
bta-let-7i	bta_circ_0004939	1
bta-let-7i	bta_circ_0006609	1
bta-miR-1	bta_circ_0014518	1
bta-miR-10020	bta_circ_0002842	1
bta-miR-10020	bta_circ_0002844	1
bta-miR-10020	bta_circ_0006415	1
bta-miR-10020	bta_circ_0014629	1
bta-miR-10161-5p	bta_circ_0004233	1
bta-miR-10161-5p	bta_circ_0004235	1
bta-miR-10161-5p	bta_circ_0004236	1
bta-miR-10161-5p	bta_circ_0004237	1
bta-miR-10161-5p	bta_circ_0005706	1
bta-miR-10161-5p	bta_circ_0005707	1
bta-miR-10161-5p	bta_circ_0005709	1
bta-miR-10161-5p	bta_circ_0005968	1
bta-miR-10161-5p	bta_circ_0008748	1
bta-miR-10161-5p	bta_circ_0008749	1
bta-miR-10161-5p	bta_circ_0010202	1
bta-miR-10161-5p	bta_circ_0011710	1
bta-miR-10161-5p	bta_circ_0013768	1
bta-miR-10161-5p	bta_circ_0013770	1
bta-miR-10161-5p	bta_circ_0014377	1
bta-miR-10161-5p	bta_circ_0014378	1
bta-miR-10161-5p	bta_circ_0014447	1
bta-miR-10161-5p	bta_circ_0014449	1
bta-miR-10162-5p	bta_circ_0006585	1
bta-miR-10162-5p	bta_circ_0006586	1
bta-miR-10162-5p	bta_circ_0011072	1
bta-miR-10162-5p	bta_circ_0011073	1
bta-miR-10162-5p	bta_circ_0011074	1
bta-miR-10163-3p	bta_circ_0000449	1
bta-miR-10163-3p	bta_circ_0003041	1
bta-miR-10163-3p	bta_circ_0003042	1
bta-miR-10163-3p	bta_circ_0003044	1
bta-miR-10163-3p	bta_circ_0003046	1
bta-miR-10163-3p	bta_circ_0003048	1
bta-miR-10163-3p	bta_circ_0003049	1
bta-miR-10163-3p	bta_circ_0003050	1
bta-miR-10163-3p	bta_circ_0004936	1
bta-miR-10165-5p	bta_circ_0004963	1
bta-miR-10165-5p	bta_circ_0004964	1
bta-miR-10166-5p	bta_circ_0013562	1
bta-miR-10167-3p	bta_circ_0012373	1
bta-miR-10167-3p	bta_circ_0012374	1
bta-miR-10168-5p	bta_circ_0002377	1
bta-miR-10168-5p	bta_circ_0002378	1
bta-miR-10168-5p	bta_circ_0002379	1
bta-miR-10168-5p	bta_circ_0006183	1
bta-miR-10168-5p	bta_circ_0007652	1
bta-miR-10168-5p	bta_circ_0007653	1
bta-miR-10168-5p	bta_circ_0010455	1
bta-miR-10169-3p	bta_circ_0004596	1
bta-miR-10169-3p	bta_circ_0004597	1
bta-miR-10169-3p	bta_circ_0004598	1
bta-miR-10169-3p	bta_circ_0005023	1
bta-miR-10169-3p	bta_circ_0005640	1
bta-miR-10169-3p	bta_circ_0006604	1
bta-miR-10169-3p	bta_circ_0006606	1
bta-miR-10169-3p	bta_circ_0006607	1
bta-miR-10169-3p	bta_circ_0006608	1
bta-miR-10169-3p	bta_circ_0006609	1
bta-miR-10169-3p	bta_circ_0008216	1
bta-miR-10169-3p	bta_circ_0008837	1
bta-miR-10169-3p	bta_circ_0009273	1
bta-miR-10169-3p	bta_circ_0009277	1
bta-miR-10169-3p	bta_circ_0009278	1
bta-miR-10169-3p	bta_circ_0012371	1
bta-miR-10169-3p	bta_circ_0012375	1
bta-miR-10169-3p	bta_circ_0012481	1
bta-miR-10169-3p	bta_circ_0012483	1
bta-miR-10169-3p	bta_circ_0014629	1
bta-miR-10171-3p	bta_circ_0003892	1
bta-miR-10171-3p	bta_circ_0010577	1
bta-miR-10171-3p	bta_circ_0010582	1
bta-miR-10172-5p	bta_circ_0005006	1
bta-miR-10172-5p	bta_circ_0005007	1
bta-miR-10172-5p	bta_circ_0011710	1
bta-miR-10173-5p	bta_circ_0008220	1
bta-miR-10173-5p	bta_circ_0008234	1
bta-miR-10173-5p	bta_circ_0010874	1
bta-miR-10173-5p	bta_circ_0010882	1
bta-miR-10173-5p	bta_circ_0010890	1
bta-miR-10173-5p	bta_circ_0010896	1
bta-miR-10174-3p	bta_circ_0012508	1
bta-miR-10174-3p	bta_circ_0012509	1
bta-miR-10174-3p	bta_circ_0012510	1
bta-miR-10174-3p	bta_circ_0012511	1
bta-miR-10174-3p	bta_circ_0012512	1
bta-miR-10174-5p	bta_circ_0011119	1
bta-miR-10175-3p	bta_circ_0003348	1
bta-miR-10175-3p	bta_circ_0003349	1
bta-miR-10175-3p	bta_circ_0011631	1
bta-miR-10175-3p	bta_circ_0011706	1
bta-miR-10177-5p	bta_circ_0007208	1
bta-miR-10177-5p	bta_circ_0007209	1
bta-miR-10177-5p	bta_circ_0007214	1
bta-miR-10178-5p	bta_circ_0004859	1
bta-miR-10178-5p	bta_circ_0005463	1
bta-miR-10178-5p	bta_circ_0006854	1
bta-miR-10178-5p	bta_circ_0006855	1
bta-miR-10178-5p	bta_circ_0011045	1
bta-miR-10178-5p	bta_circ_0011046	1
bta-miR-10179-5p	bta_circ_0001618	1
bta-miR-10179-5p	bta_circ_0001619	1
bta-miR-10179-5p	bta_circ_0005792	1
bta-miR-10179-5p	bta_circ_0006830	1
bta-miR-10179-5p	bta_circ_0010441	1
bta-miR-10181-5p	bta_circ_0006841	1
bta-miR-10182-3p	bta_circ_0011056	1
bta-miR-10184-3p	bta_circ_0008354	1
bta-miR-10184-3p	bta_circ_0008355	1
bta-miR-105a	bta_circ_0008147	1
bta-miR-105a	bta_circ_0009851	2
bta-miR-105a	bta_circ_0009902	1
bta-miR-105a	bta_circ_0011245	1
bta-miR-105b	bta_circ_0008147	1
bta-miR-105b	bta_circ_0011245	1
bta-miR-106a	bta_circ_0004170	1
bta-miR-106a	bta_circ_0004172	1
bta-miR-106a	bta_circ_0006692	1
bta-miR-106a	bta_circ_0006694	1
bta-miR-106a	bta_circ_0008218	1
bta-miR-10a	bta_circ_0007040	1
bta-miR-10b	bta_circ_0007040	1
bta-miR-1193	bta_circ_0003319	1
bta-miR-11971	bta_circ_0004468	1
bta-miR-11972	bta_circ_0005380	1
bta-miR-11972	bta_circ_0008762	1
bta-miR-11972	bta_circ_0008763	1
bta-miR-11972	bta_circ_0008924	1
bta-miR-11973	bta_circ_0001618	1
bta-miR-11973	bta_circ_0001619	1
bta-miR-11973	bta_circ_0001620	1
bta-miR-11973	bta_circ_0001889	1
bta-miR-11973	bta_circ_0003220	1
bta-miR-11973	bta_circ_0008752	1
bta-miR-11974	bta_circ_0003597	1
bta-miR-11974	bta_circ_0003630	1
bta-miR-11974	bta_circ_0007204	1
bta-miR-11974	bta_circ_0010295	1
bta-miR-11975	bta_circ_0010518	1
bta-miR-11975	bta_circ_0010519	1
bta-miR-11975	bta_circ_0012938	1
bta-miR-11976	bta_circ_0010518	1
bta-miR-11976	bta_circ_0010519	1
bta-miR-11976	bta_circ_0011283	1
bta-miR-11976	bta_circ_0012938	1
bta-miR-11977	bta_circ_0013645	1
bta-miR-11978	bta_circ_0006415	1
bta-miR-11981	bta_circ_0008238	1
bta-miR-11981	bta_circ_0009269	1
bta-miR-11981	bta_circ_0009270	1
bta-miR-11981	bta_circ_0009271	1
bta-miR-11981	bta_circ_0009273	1
bta-miR-11981	bta_circ_0009276	1
bta-miR-11981	bta_circ_0009277	1
bta-miR-11981	bta_circ_0009278	1
bta-miR-11986	bta_circ_0006152	1
bta-miR-11986b	bta_circ_0000074	1
bta-miR-11986b	bta_circ_0000075	1
bta-miR-11986b	bta_circ_0000076	1
bta-miR-11986b	bta_circ_0000077	2
bta-miR-11986b	bta_circ_0000078	3
bta-miR-11986b	bta_circ_0000109	1
bta-miR-11986b	bta_circ_0000110	3
bta-miR-11986b	bta_circ_0000111	3
bta-miR-11986b	bta_circ_0000113	1
bta-miR-11986b	bta_circ_0000116	1
bta-miR-11986b	bta_circ_0000119	1
bta-miR-11986b	bta_circ_0000120	1
bta-miR-11986b	bta_circ_0000123	1
bta-miR-11986b	bta_circ_0000314	2
bta-miR-11986b	bta_circ_0000353	1
bta-miR-11986b	bta_circ_0000412	1
bta-miR-11986b	bta_circ_0000437	1
bta-miR-11986b	bta_circ_0000449	1
bta-miR-11986b	bta_circ_0000499	1
bta-miR-11986b	bta_circ_0000507	1
bta-miR-11986b	bta_circ_0000536	2
bta-miR-11986b	bta_circ_0000537	4
bta-miR-11986b	bta_circ_0000555	1
bta-miR-11986b	bta_circ_0000618	2
bta-miR-11986b	bta_circ_0000619	2
bta-miR-11986b	bta_circ_0000880	1
bta-miR-11986b	bta_circ_0000947	3
bta-miR-11986b	bta_circ_0000949	1
bta-miR-11986b	bta_circ_0001030	1
bta-miR-11986b	bta_circ_0001364	1
bta-miR-11986b	bta_circ_0001368	2
bta-miR-11986b	bta_circ_0001380	1
bta-miR-11986b	bta_circ_0001398	1
bta-miR-11986b	bta_circ_0001451	2
bta-miR-11986b	bta_circ_0001519	1
bta-miR-11986b	bta_circ_0001651	3
bta-miR-11986b	bta_circ_0001717	2
bta-miR-11986b	bta_circ_0001930	1
bta-miR-11986b	bta_circ_0002004	1
bta-miR-11986b	bta_circ_0002075	3
bta-miR-11986b	bta_circ_0002076	3
bta-miR-11986b	bta_circ_0002187	1
bta-miR-11986b	bta_circ_0002250	2
bta-miR-11986b	bta_circ_0002492	1
bta-miR-11986b	bta_circ_0002570	1
bta-miR-11986b	bta_circ_0002571	1
bta-miR-11986b	bta_circ_0002572	4
bta-miR-11986b	bta_circ_0002595	1
bta-miR-11986b	bta_circ_0002607	1
bta-miR-11986b	bta_circ_0002850	2
bta-miR-11986b	bta_circ_0002887	3
bta-miR-11986b	bta_circ_0002890	3
bta-miR-11986b	bta_circ_0002891	4
bta-miR-11986b	bta_circ_0003024	2
bta-miR-11986b	bta_circ_0003087	1
bta-miR-11986b	bta_circ_0003088	1
bta-miR-11986b	bta_circ_0003169	1
bta-miR-11986b	bta_circ_0003173	2
bta-miR-11986b	bta_circ_0003198	2
bta-miR-11986b	bta_circ_0003199	3
bta-miR-11986b	bta_circ_0003292	1
bta-miR-11986b	bta_circ_0003429	1
bta-miR-11986b	bta_circ_0003434	1
bta-miR-11986b	bta_circ_0003541	1
bta-miR-11986b	bta_circ_0003545	2
bta-miR-11986b	bta_circ_0003561	1
bta-miR-11986b	bta_circ_0003590	1
bta-miR-11986b	bta_circ_0003707	1
bta-miR-11986b	bta_circ_0003708	1
bta-miR-11986b	bta_circ_0003721	2
bta-miR-11986b	bta_circ_0003763	2
bta-miR-11986b	bta_circ_0003925	1
bta-miR-11986b	bta_circ_0004023	1
bta-miR-11986b	bta_circ_0004024	1
bta-miR-11986b	bta_circ_0004026	1
bta-miR-11986b	bta_circ_0004117	1
bta-miR-11986b	bta_circ_0004258	1
bta-miR-11986b	bta_circ_0004303	1
bta-miR-11986b	bta_circ_0004311	2
bta-miR-11986b	bta_circ_0004332	2
bta-miR-11986b	bta_circ_0004388	1
bta-miR-11986b	bta_circ_0004389	1
bta-miR-11986b	bta_circ_0004489	3
bta-miR-11986b	bta_circ_0004518	1
bta-miR-11986b	bta_circ_0004570	1
bta-miR-11986b	bta_circ_0004571	1
bta-miR-11986b	bta_circ_0004572	1
bta-miR-11986b	bta_circ_0004776	1
bta-miR-11986b	bta_circ_0004995	1
bta-miR-11986b	bta_circ_0005046	2
bta-miR-11986b	bta_circ_0005047	1
bta-miR-11986b	bta_circ_0005111	1
bta-miR-11986b	bta_circ_0005185	2
bta-miR-11986b	bta_circ_0005229	1
bta-miR-11986b	bta_circ_0005230	1
bta-miR-11986b	bta_circ_0005326	3
bta-miR-11986b	bta_circ_0005416	1
bta-miR-11986b	bta_circ_0005437	1
bta-miR-11986b	bta_circ_0005463	1
bta-miR-11986b	bta_circ_0005524	1
bta-miR-11986b	bta_circ_0005526	1
bta-miR-11986b	bta_circ_0005553	1
bta-miR-11986b	bta_circ_0005649	1
bta-miR-11986b	bta_circ_0005664	2
bta-miR-11986b	bta_circ_0005699	3
bta-miR-11986b	bta_circ_0005700	2
bta-miR-11986b	bta_circ_0005702	2
bta-miR-11986b	bta_circ_0005703	4
bta-miR-11986b	bta_circ_0005705	2
bta-miR-11986b	bta_circ_0005706	5
bta-miR-11986b	bta_circ_0005707	3
bta-miR-11986b	bta_circ_0005779	1
bta-miR-11986b	bta_circ_0005781	1
bta-miR-11986b	bta_circ_0005782	1
bta-miR-11986b	bta_circ_0005792	3
bta-miR-11986b	bta_circ_0005845	1
bta-miR-11986b	bta_circ_0005846	1
bta-miR-11986b	bta_circ_0005848	1
bta-miR-11986b	bta_circ_0005849	3
bta-miR-11986b	bta_circ_0005862	1
bta-miR-11986b	bta_circ_0005863	1
bta-miR-11986b	bta_circ_0005864	2
bta-miR-11986b	bta_circ_0005872	2
bta-miR-11986b	bta_circ_0005873	1
bta-miR-11986b	bta_circ_0005875	1
bta-miR-11986b	bta_circ_0005876	1
bta-miR-11986b	bta_circ_0005877	2
bta-miR-11986b	bta_circ_0005878	2
bta-miR-11986b	bta_circ_0005882	1
bta-miR-11986b	bta_circ_0005886	2
bta-miR-11986b	bta_circ_0005889	2
bta-miR-11986b	bta_circ_0005906	2
bta-miR-11986b	bta_circ_0005938	1
bta-miR-11986b	bta_circ_0005940	1
bta-miR-11986b	bta_circ_0005941	1
bta-miR-11986b	bta_circ_0005942	1
bta-miR-11986b	bta_circ_0005955	2
bta-miR-11986b	bta_circ_0006015	2
bta-miR-11986b	bta_circ_0006031	1
bta-miR-11986b	bta_circ_0006034	1
bta-miR-11986b	bta_circ_0006035	2
bta-miR-11986b	bta_circ_0006045	1
bta-miR-11986b	bta_circ_0006111	1
bta-miR-11986b	bta_circ_0006114	1
bta-miR-11986b	bta_circ_0006118	1
bta-miR-11986b	bta_circ_0006151	1
bta-miR-11986b	bta_circ_0006152	5
bta-miR-11986b	bta_circ_0006288	1
bta-miR-11986b	bta_circ_0006329	2
bta-miR-11986b	bta_circ_0006388	5
bta-miR-11986b	bta_circ_0006395	1
bta-miR-11986b	bta_circ_0006564	1
bta-miR-11986b	bta_circ_0006632	1
bta-miR-11986b	bta_circ_0006633	1
bta-miR-11986b	bta_circ_0006754	1
bta-miR-11986b	bta_circ_0006799	2
bta-miR-11986b	bta_circ_0006803	3
bta-miR-11986b	bta_circ_0006806	2
bta-miR-11986b	bta_circ_0006807	2
bta-miR-11986b	bta_circ_0006809	1
bta-miR-11986b	bta_circ_0006810	2
bta-miR-11986b	bta_circ_0006811	2
bta-miR-11986b	bta_circ_0006812	2
bta-miR-11986b	bta_circ_0006813	2
bta-miR-11986b	bta_circ_0006814	3
bta-miR-11986b	bta_circ_0006815	2
bta-miR-11986b	bta_circ_0006818	1
bta-miR-11986b	bta_circ_0006830	2
bta-miR-11986b	bta_circ_0006841	1
bta-miR-11986b	bta_circ_0006887	1
bta-miR-11986b	bta_circ_0006910	1
bta-miR-11986b	bta_circ_0006961	3
bta-miR-11986b	bta_circ_0007020	2
bta-miR-11986b	bta_circ_0007023	3
bta-miR-11986b	bta_circ_0007062	1
bta-miR-11986b	bta_circ_0007100	2
bta-miR-11986b	bta_circ_0007101	3
bta-miR-11986b	bta_circ_0007232	2
bta-miR-11986b	bta_circ_0007235	1
bta-miR-11986b	bta_circ_0007426	1
bta-miR-11986b	bta_circ_0007427	1
bta-miR-11986b	bta_circ_0007465	1
bta-miR-11986b	bta_circ_0007466	1
bta-miR-11986b	bta_circ_0007467	1
bta-miR-11986b	bta_circ_0007468	1
bta-miR-11986b	bta_circ_0007493	1
bta-miR-11986b	bta_circ_0007592	5
bta-miR-11986b	bta_circ_0007799	1
bta-miR-11986b	bta_circ_0007803	1
bta-miR-11986b	bta_circ_0007805	1
bta-miR-11986b	bta_circ_0007995	1
bta-miR-11986b	bta_circ_0008147	2
bta-miR-11986b	bta_circ_0008159	1
bta-miR-11986b	bta_circ_0008270	3
bta-miR-11986b	bta_circ_0008275	1
bta-miR-11986b	bta_circ_0008361	1
bta-miR-11986b	bta_circ_0008394	7
bta-miR-11986b	bta_circ_0008396	2
bta-miR-11986b	bta_circ_0008479	1
bta-miR-11986b	bta_circ_0008490	3
bta-miR-11986b	bta_circ_0008568	1
bta-miR-11986b	bta_circ_0008602	1
bta-miR-11986b	bta_circ_0008748	2
bta-miR-11986b	bta_circ_0008749	2
bta-miR-11986b	bta_circ_0008752	2
bta-miR-11986b	bta_circ_0008785	1
bta-miR-11986b	bta_circ_0008790	1
bta-miR-11986b	bta_circ_0008791	1
bta-miR-11986b	bta_circ_0008922	1
bta-miR-11986b	bta_circ_0008924	1
bta-miR-11986b	bta_circ_0009159	2
bta-miR-11986b	bta_circ_0009183	1
bta-miR-11986b	bta_circ_0009184	1
bta-miR-11986b	bta_circ_0009188	1
bta-miR-11986b	bta_circ_0009242	3
bta-miR-11986b	bta_circ_0009243	3
bta-miR-11986b	bta_circ_0009245	3
bta-miR-11986b	bta_circ_0009252	1
bta-miR-11986b	bta_circ_0009269	1
bta-miR-11986b	bta_circ_0009270	1
bta-miR-11986b	bta_circ_0009271	1
bta-miR-11986b	bta_circ_0009273	1
bta-miR-11986b	bta_circ_0009304	1
bta-miR-11986b	bta_circ_0009319	1
bta-miR-11986b	bta_circ_0009320	1
bta-miR-11986b	bta_circ_0009323	5
bta-miR-11986b	bta_circ_0009352	2
bta-miR-11986b	bta_circ_0009353	3
bta-miR-11986b	bta_circ_0009354	1
bta-miR-11986b	bta_circ_0009513	1
bta-miR-11986b	bta_circ_0009514	1
bta-miR-11986b	bta_circ_0009515	4
bta-miR-11986b	bta_circ_0009516	5
bta-miR-11986b	bta_circ_0009519	1
bta-miR-11986b	bta_circ_0009581	3
bta-miR-11986b	bta_circ_0009582	3
bta-miR-11986b	bta_circ_0009584	1
bta-miR-11986b	bta_circ_0009585	1
bta-miR-11986b	bta_circ_0009586	2
bta-miR-11986b	bta_circ_0009587	6
bta-miR-11986b	bta_circ_0009588	8
bta-miR-11986b	bta_circ_0009590	1
bta-miR-11986b	bta_circ_0009591	1
bta-miR-11986b	bta_circ_0009594	2
bta-miR-11986b	bta_circ_0009595	1
bta-miR-11986b	bta_circ_0009596	1
bta-miR-11986b	bta_circ_0009598	1
bta-miR-11986b	bta_circ_0009599	1
bta-miR-11986b	bta_circ_0009600	1
bta-miR-11986b	bta_circ_0009601	8
bta-miR-11986b	bta_circ_0009715	1
bta-miR-11986b	bta_circ_0009716	1
bta-miR-11986b	bta_circ_0009774	1
bta-miR-11986b	bta_circ_0009827	2
bta-miR-11986b	bta_circ_0009829	1
bta-miR-11986b	bta_circ_0009902	1
bta-miR-11986b	bta_circ_0010068	1
bta-miR-11986b	bta_circ_0010074	2
bta-miR-11986b	bta_circ_0010089	1
bta-miR-11986b	bta_circ_0010091	2
bta-miR-11986b	bta_circ_0010093	1
bta-miR-11986b	bta_circ_0010094	1
bta-miR-11986b	bta_circ_0010095	2
bta-miR-11986b	bta_circ_0010202	1
bta-miR-11986b	bta_circ_0010276	1
bta-miR-11986b	bta_circ_0010308	1
bta-miR-11986b	bta_circ_0010605	1
bta-miR-11986b	bta_circ_0010623	7
bta-miR-11986b	bta_circ_0010954	3
bta-miR-11986b	bta_circ_0010955	3
bta-miR-11986b	bta_circ_0010956	1
bta-miR-11986b	bta_circ_0011213	2
bta-miR-11986b	bta_circ_0011215	1
bta-miR-11986b	bta_circ_0011245	1
bta-miR-11986b	bta_circ_0011247	1
bta-miR-11986b	bta_circ_0011263	1
bta-miR-11986b	bta_circ_0011297	2
bta-miR-11986b	bta_circ_0011298	2
bta-miR-11986b	bta_circ_0011300	2
bta-miR-11986b	bta_circ_0011301	2
bta-miR-11986b	bta_circ_0011302	2
bta-miR-11986b	bta_circ_0011417	1
bta-miR-11986b	bta_circ_0011506	2
bta-miR-11986b	bta_circ_0011510	1
bta-miR-11986b	bta_circ_0011527	3
bta-miR-11986b	bta_circ_0011538	2
bta-miR-11986b	bta_circ_0011561	2
bta-miR-11986b	bta_circ_0011613	1
bta-miR-11986b	bta_circ_0011614	1
bta-miR-11986b	bta_circ_0011634	1
bta-miR-11986b	bta_circ_0011706	2
bta-miR-11986b	bta_circ_0011708	2
bta-miR-11986b	bta_circ_0011710	4
bta-miR-11986b	bta_circ_0011746	1
bta-miR-11986b	bta_circ_0011756	4
bta-miR-11986b	bta_circ_0011757	4
bta-miR-11986b	bta_circ_0011775	1
bta-miR-11986b	bta_circ_0011797	1
bta-miR-11986b	bta_circ_0011798	1
bta-miR-11986b	bta_circ_0011799	1
bta-miR-11986b	bta_circ_0011869	1
bta-miR-11986b	bta_circ_0011870	1
bta-miR-11986b	bta_circ_0011875	1
bta-miR-11986b	bta_circ_0011876	1
bta-miR-11986b	bta_circ_0011877	1
bta-miR-11986b	bta_circ_0011881	1
bta-miR-11986b	bta_circ_0011997	1
bta-miR-11986b	bta_circ_0012007	1
bta-miR-11986b	bta_circ_0012053	2
bta-miR-11986b	bta_circ_0012079	1
bta-miR-11986b	bta_circ_0012093	1
bta-miR-11986b	bta_circ_0012157	2
bta-miR-11986b	bta_circ_0012289	1
bta-miR-11986b	bta_circ_0012294	1
bta-miR-11986b	bta_circ_0012359	3
bta-miR-11986b	bta_circ_0012360	4
bta-miR-11986b	bta_circ_0012370	2
bta-miR-11986b	bta_circ_0012371	3
bta-miR-11986b	bta_circ_0012375	1
bta-miR-11986b	bta_circ_0012481	2
bta-miR-11986b	bta_circ_0012483	2
bta-miR-11986b	bta_circ_0012507	1
bta-miR-11986b	bta_circ_0012508	1
bta-miR-11986b	bta_circ_0012509	2
bta-miR-11986b	bta_circ_0012510	3
bta-miR-11986b	bta_circ_0012511	6
bta-miR-11986b	bta_circ_0012512	1
bta-miR-11986b	bta_circ_0012571	1
bta-miR-11986b	bta_circ_0012783	1
bta-miR-11986b	bta_circ_0012916	1
bta-miR-11986b	bta_circ_0012938	1
bta-miR-11986b	bta_circ_0012941	1
bta-miR-11986b	bta_circ_0012942	1
bta-miR-11986b	bta_circ_0012952	1
bta-miR-11986b	bta_circ_0013174	1
bta-miR-11986b	bta_circ_0013180	1
bta-miR-11986b	bta_circ_0013230	2
bta-miR-11986b	bta_circ_0013270	1
bta-miR-11986b	bta_circ_0013272	1
bta-miR-11986b	bta_circ_0013303	1
bta-miR-11986b	bta_circ_0013321	1
bta-miR-11986b	bta_circ_0013406	1
bta-miR-11986b	bta_circ_0013414	1
bta-miR-11986b	bta_circ_0013434	1
bta-miR-11986b	bta_circ_0013438	1
bta-miR-11986b	bta_circ_0013504	1
bta-miR-11986b	bta_circ_0013745	1
bta-miR-11986b	bta_circ_0013804	1
bta-miR-11986b	bta_circ_0013805	2
bta-miR-11986b	bta_circ_0014022	3
bta-miR-11986b	bta_circ_0014023	3
bta-miR-11986b	bta_circ_0014114	1
bta-miR-11986b	bta_circ_0014194	3
bta-miR-11986b	bta_circ_0014229	2
bta-miR-11986b	bta_circ_0014230	1
bta-miR-11986b	bta_circ_0014231	1
bta-miR-11986b	bta_circ_0014242	5
bta-miR-11986b	bta_circ_0014330	1
bta-miR-11986b	bta_circ_0014333	1
bta-miR-11986b	bta_circ_0014356	1
bta-miR-11986b	bta_circ_0014364	1
bta-miR-11986b	bta_circ_0014366	1
bta-miR-11986b	bta_circ_0014377	1
bta-miR-11986b	bta_circ_0014378	1
bta-miR-11986b	bta_circ_0014425	1
bta-miR-11986b	bta_circ_0014468	1
bta-miR-11986b	bta_circ_0014594	1
bta-miR-11986b	bta_circ_0014595	2
bta-miR-11986b	bta_circ_0014610	1
bta-miR-11986b	bta_circ_0014613	1
bta-miR-11986b	bta_circ_0014614	1
bta-miR-11986b	bta_circ_0014619	1
bta-miR-11986b	bta_circ_0014628	1
bta-miR-11986b	bta_circ_0014629	8
bta-miR-11986b	bta_circ_0014633	7
bta-miR-11986b	bta_circ_0014635	2
bta-miR-11986c	bta_circ_0005792	1
bta-miR-11987	bta_circ_0011325	1
bta-miR-11987	bta_circ_0011326	1
bta-miR-11987	bta_circ_0011327	1
bta-miR-11987	bta_circ_0011328	1
bta-miR-11987	bta_circ_0011329	1
bta-miR-11987	bta_circ_0011330	1
bta-miR-11987	bta_circ_0011331	1
bta-miR-11987	bta_circ_0011332	1
bta-miR-11988	bta_circ_0000110	6
bta-miR-11988	bta_circ_0000111	6
bta-miR-11988	bta_circ_0000119	5
bta-miR-11988	bta_circ_0000120	1
bta-miR-11988	bta_circ_0000123	1
bta-miR-11988	bta_circ_0000285	3
bta-miR-11988	bta_circ_0000314	1
bta-miR-11988	bta_circ_0000437	1
bta-miR-11988	bta_circ_0000442	2
bta-miR-11988	bta_circ_0000449	3
bta-miR-11988	bta_circ_0000483	1
bta-miR-11988	bta_circ_0000778	1
bta-miR-11988	bta_circ_0000892	1
bta-miR-11988	bta_circ_0000947	2
bta-miR-11988	bta_circ_0001027	3
bta-miR-11988	bta_circ_0001030	4
bta-miR-11988	bta_circ_0001048	1
bta-miR-11988	bta_circ_0001052	1
bta-miR-11988	bta_circ_0001368	1
bta-miR-11988	bta_circ_0001380	1
bta-miR-11988	bta_circ_0001451	1
bta-miR-11988	bta_circ_0001519	1
bta-miR-11988	bta_circ_0001651	4
bta-miR-11988	bta_circ_0001663	1
bta-miR-11988	bta_circ_0001717	1
bta-miR-11988	bta_circ_0001929	2
bta-miR-11988	bta_circ_0001930	3
bta-miR-11988	bta_circ_0001965	1
bta-miR-11988	bta_circ_0002081	1
bta-miR-11988	bta_circ_0002378	3
bta-miR-11988	bta_circ_0002379	3
bta-miR-11988	bta_circ_0002383	3
bta-miR-11988	bta_circ_0002384	3
bta-miR-11988	bta_circ_0002386	3
bta-miR-11988	bta_circ_0002387	3
bta-miR-11988	bta_circ_0002484	1
bta-miR-11988	bta_circ_0002485	1
bta-miR-11988	bta_circ_0002570	1
bta-miR-11988	bta_circ_0002571	2
bta-miR-11988	bta_circ_0002572	4
bta-miR-11988	bta_circ_0002576	1
bta-miR-11988	bta_circ_0002595	2
bta-miR-11988	bta_circ_0002607	3
bta-miR-11988	bta_circ_0002628	2
bta-miR-11988	bta_circ_0002695	1
bta-miR-11988	bta_circ_0002802	1
bta-miR-11988	bta_circ_0002850	1
bta-miR-11988	bta_circ_0002866	1
bta-miR-11988	bta_circ_0002867	1
bta-miR-11988	bta_circ_0002887	3
bta-miR-11988	bta_circ_0002890	2
bta-miR-11988	bta_circ_0002891	3
bta-miR-11988	bta_circ_0003024	1
bta-miR-11988	bta_circ_0003169	1
bta-miR-11988	bta_circ_0003171	1
bta-miR-11988	bta_circ_0003173	2
bta-miR-11988	bta_circ_0003292	1
bta-miR-11988	bta_circ_0003429	1
bta-miR-11988	bta_circ_0003541	3
bta-miR-11988	bta_circ_0003545	6
bta-miR-11988	bta_circ_0003561	2
bta-miR-11988	bta_circ_0003592	2
bta-miR-11988	bta_circ_0003675	1
bta-miR-11988	bta_circ_0003698	1
bta-miR-11988	bta_circ_0003702	1
bta-miR-11988	bta_circ_0003708	2
bta-miR-11988	bta_circ_0003719	1
bta-miR-11988	bta_circ_0003720	1
bta-miR-11988	bta_circ_0003939	1
bta-miR-11988	bta_circ_0004026	1
bta-miR-11988	bta_circ_0004121	1
bta-miR-11988	bta_circ_0004130	1
bta-miR-11988	bta_circ_0004170	1
bta-miR-11988	bta_circ_0004258	1
bta-miR-11988	bta_circ_0004285	1
bta-miR-11988	bta_circ_0004288	1
bta-miR-11988	bta_circ_0004303	2
bta-miR-11988	bta_circ_0004311	1
bta-miR-11988	bta_circ_0004332	4
bta-miR-11988	bta_circ_0004388	3
bta-miR-11988	bta_circ_0004389	3
bta-miR-11988	bta_circ_0004391	1
bta-miR-11988	bta_circ_0004392	1
bta-miR-11988	bta_circ_0004489	4
bta-miR-11988	bta_circ_0004776	1
bta-miR-11988	bta_circ_0004876	2
bta-miR-11988	bta_circ_0004939	2
bta-miR-11988	bta_circ_0004941	2
bta-miR-11988	bta_circ_0004942	1
bta-miR-11988	bta_circ_0005000	1
bta-miR-11988	bta_circ_0005001	1
bta-miR-11988	bta_circ_0005002	1
bta-miR-11988	bta_circ_0005006	2
bta-miR-11988	bta_circ_0005007	4
bta-miR-11988	bta_circ_0005023	1
bta-miR-11988	bta_circ_0005046	2
bta-miR-11988	bta_circ_0005047	1
bta-miR-11988	bta_circ_0005055	2
bta-miR-11988	bta_circ_0005105	1
bta-miR-11988	bta_circ_0005229	1
bta-miR-11988	bta_circ_0005230	2
bta-miR-11988	bta_circ_0005326	1
bta-miR-11988	bta_circ_0005419	2
bta-miR-11988	bta_circ_0005437	1
bta-miR-11988	bta_circ_0005495	3
bta-miR-11988	bta_circ_0005497	1
bta-miR-11988	bta_circ_0005553	2
bta-miR-11988	bta_circ_0005615	1
bta-miR-11988	bta_circ_0005616	1
bta-miR-11988	bta_circ_0005617	1
bta-miR-11988	bta_circ_0005618	3
bta-miR-11988	bta_circ_0005678	1
bta-miR-11988	bta_circ_0005699	2
bta-miR-11988	bta_circ_0005702	1
bta-miR-11988	bta_circ_0005703	2
bta-miR-11988	bta_circ_0005705	2
bta-miR-11988	bta_circ_0005706	8
bta-miR-11988	bta_circ_0005707	6
bta-miR-11988	bta_circ_0005709	1
bta-miR-11988	bta_circ_0005779	1
bta-miR-11988	bta_circ_0005792	1
bta-miR-11988	bta_circ_0005805	1
bta-miR-11988	bta_circ_0005845	2
bta-miR-11988	bta_circ_0005846	2
bta-miR-11988	bta_circ_0005848	2
bta-miR-11988	bta_circ_0005849	3
bta-miR-11988	bta_circ_0005861	1
bta-miR-11988	bta_circ_0005862	2
bta-miR-11988	bta_circ_0005863	1
bta-miR-11988	bta_circ_0005864	1
bta-miR-11988	bta_circ_0005872	2
bta-miR-11988	bta_circ_0005876	1
bta-miR-11988	bta_circ_0005877	1
bta-miR-11988	bta_circ_0005878	2
bta-miR-11988	bta_circ_0005880	1
bta-miR-11988	bta_circ_0005882	2
bta-miR-11988	bta_circ_0005886	1
bta-miR-11988	bta_circ_0005889	1
bta-miR-11988	bta_circ_0005906	4
bta-miR-11988	bta_circ_0005924	1
bta-miR-11988	bta_circ_0005938	2
bta-miR-11988	bta_circ_0005939	1
bta-miR-11988	bta_circ_0005940	2
bta-miR-11988	bta_circ_0005941	2
bta-miR-11988	bta_circ_0005942	3
bta-miR-11988	bta_circ_0005946	1
bta-miR-11988	bta_circ_0005955	3
bta-miR-11988	bta_circ_0005978	1
bta-miR-11988	bta_circ_0006015	3
bta-miR-11988	bta_circ_0006023	1
bta-miR-11988	bta_circ_0006027	1
bta-miR-11988	bta_circ_0006031	2
bta-miR-11988	bta_circ_0006045	3
bta-miR-11988	bta_circ_0006057	1
bta-miR-11988	bta_circ_0006068	1
bta-miR-11988	bta_circ_0006070	1
bta-miR-11988	bta_circ_0006111	3
bta-miR-11988	bta_circ_0006114	2
bta-miR-11988	bta_circ_0006118	1
bta-miR-11988	bta_circ_0006129	4
bta-miR-11988	bta_circ_0006151	1
bta-miR-11988	bta_circ_0006152	8
bta-miR-11988	bta_circ_0006257	2
bta-miR-11988	bta_circ_0006288	2
bta-miR-11988	bta_circ_0006322	1
bta-miR-11988	bta_circ_0006323	1
bta-miR-11988	bta_circ_0006329	1
bta-miR-11988	bta_circ_0006351	1
bta-miR-11988	bta_circ_0006366	1
bta-miR-11988	bta_circ_0006386	1
bta-miR-11988	bta_circ_0006387	5
bta-miR-11988	bta_circ_0006388	10
bta-miR-11988	bta_circ_0006389	4
bta-miR-11988	bta_circ_0006393	1
bta-miR-11988	bta_circ_0006395	3
bta-miR-11988	bta_circ_0006452	1
bta-miR-11988	bta_circ_0006459	3
bta-miR-11988	bta_circ_0006609	1
bta-miR-11988	bta_circ_0006632	1
bta-miR-11988	bta_circ_0006633	1
bta-miR-11988	bta_circ_0006750	1
bta-miR-11988	bta_circ_0006753	1
bta-miR-11988	bta_circ_0006754	3
bta-miR-11988	bta_circ_0006756	1
bta-miR-11988	bta_circ_0006799	1
bta-miR-11988	bta_circ_0006803	5
bta-miR-11988	bta_circ_0006806	1
bta-miR-11988	bta_circ_0006807	1
bta-miR-11988	bta_circ_0006809	1
bta-miR-11988	bta_circ_0006810	1
bta-miR-11988	bta_circ_0006811	1
bta-miR-11988	bta_circ_0006812	1
bta-miR-11988	bta_circ_0006813	1
bta-miR-11988	bta_circ_0006814	1
bta-miR-11988	bta_circ_0006815	1
bta-miR-11988	bta_circ_0006830	5
bta-miR-11988	bta_circ_0006831	1
bta-miR-11988	bta_circ_0006841	1
bta-miR-11988	bta_circ_0006887	1
bta-miR-11988	bta_circ_0006910	1
bta-miR-11988	bta_circ_0006914	1
bta-miR-11988	bta_circ_0006916	1
bta-miR-11988	bta_circ_0006961	2
bta-miR-11988	bta_circ_0006986	2
bta-miR-11988	bta_circ_0006999	1
bta-miR-11988	bta_circ_0007084	2
bta-miR-11988	bta_circ_0007100	2
bta-miR-11988	bta_circ_0007101	2
bta-miR-11988	bta_circ_0007232	3
bta-miR-11988	bta_circ_0007298	1
bta-miR-11988	bta_circ_0007304	1
bta-miR-11988	bta_circ_0007415	1
bta-miR-11988	bta_circ_0007426	2
bta-miR-11988	bta_circ_0007427	2
bta-miR-11988	bta_circ_0007464	2
bta-miR-11988	bta_circ_0007465	1
bta-miR-11988	bta_circ_0007466	1
bta-miR-11988	bta_circ_0007467	2
bta-miR-11988	bta_circ_0007468	2
bta-miR-11988	bta_circ_0007469	2
bta-miR-11988	bta_circ_0007488	2
bta-miR-11988	bta_circ_0007496	1
bta-miR-11988	bta_circ_0007592	2
bta-miR-11988	bta_circ_0007798	5
bta-miR-11988	bta_circ_0007799	6
bta-miR-11988	bta_circ_0007803	5
bta-miR-11988	bta_circ_0007805	5
bta-miR-11988	bta_circ_0007995	5
bta-miR-11988	bta_circ_0008021	1
bta-miR-11988	bta_circ_0008083	1
bta-miR-11988	bta_circ_0008143	1
bta-miR-11988	bta_circ_0008147	2
bta-miR-11988	bta_circ_0008159	2
bta-miR-11988	bta_circ_0008218	2
bta-miR-11988	bta_circ_0008394	1
bta-miR-11988	bta_circ_0008396	1
bta-miR-11988	bta_circ_0008490	6
bta-miR-11988	bta_circ_0008568	1
bta-miR-11988	bta_circ_0008584	1
bta-miR-11988	bta_circ_0008602	1
bta-miR-11988	bta_circ_0008748	1
bta-miR-11988	bta_circ_0008749	1
bta-miR-11988	bta_circ_0008752	1
bta-miR-11988	bta_circ_0008766	1
bta-miR-11988	bta_circ_0008767	1
bta-miR-11988	bta_circ_0008771	1
bta-miR-11988	bta_circ_0008785	2
bta-miR-11988	bta_circ_0008791	1
bta-miR-11988	bta_circ_0008870	1
bta-miR-11988	bta_circ_0008874	1
bta-miR-11988	bta_circ_0009040	1
bta-miR-11988	bta_circ_0009138	1
bta-miR-11988	bta_circ_0009184	2
bta-miR-11988	bta_circ_0009188	3
bta-miR-11988	bta_circ_0009242	4
bta-miR-11988	bta_circ_0009243	4
bta-miR-11988	bta_circ_0009245	4
bta-miR-11988	bta_circ_0009269	1
bta-miR-11988	bta_circ_0009270	1
bta-miR-11988	bta_circ_0009271	1
bta-miR-11988	bta_circ_0009273	1
bta-miR-11988	bta_circ_0009304	1
bta-miR-11988	bta_circ_0009320	1
bta-miR-11988	bta_circ_0009322	1
bta-miR-11988	bta_circ_0009323	3
bta-miR-11988	bta_circ_0009352	1
bta-miR-11988	bta_circ_0009353	2
bta-miR-11988	bta_circ_0009354	1
bta-miR-11988	bta_circ_0009412	1
bta-miR-11988	bta_circ_0009449	3
bta-miR-11988	bta_circ_0009513	2
bta-miR-11988	bta_circ_0009514	2
bta-miR-11988	bta_circ_0009515	5
bta-miR-11988	bta_circ_0009516	7
bta-miR-11988	bta_circ_0009579	2
bta-miR-11988	bta_circ_0009580	1
bta-miR-11988	bta_circ_0009581	5
bta-miR-11988	bta_circ_0009582	4
bta-miR-11988	bta_circ_0009583	1
bta-miR-11988	bta_circ_0009584	2
bta-miR-11988	bta_circ_0009585	3
bta-miR-11988	bta_circ_0009586	3
bta-miR-11988	bta_circ_0009587	5
bta-miR-11988	bta_circ_0009588	5
bta-miR-11988	bta_circ_0009589	1
bta-miR-11988	bta_circ_0009590	2
bta-miR-11988	bta_circ_0009591	2
bta-miR-11988	bta_circ_0009594	2
bta-miR-11988	bta_circ_0009595	1
bta-miR-11988	bta_circ_0009596	1
bta-miR-11988	bta_circ_0009597	1
bta-miR-11988	bta_circ_0009598	4
bta-miR-11988	bta_circ_0009680	2
bta-miR-11988	bta_circ_0009715	1
bta-miR-11988	bta_circ_0009716	1
bta-miR-11988	bta_circ_0009774	1
bta-miR-11988	bta_circ_0009827	2
bta-miR-11988	bta_circ_0009902	1
bta-miR-11988	bta_circ_0009913	2
bta-miR-11988	bta_circ_0009927	1
bta-miR-11988	bta_circ_0009943	1
bta-miR-11988	bta_circ_0010040	1
bta-miR-11988	bta_circ_0010068	3
bta-miR-11988	bta_circ_0010069	1
bta-miR-11988	bta_circ_0010199	2
bta-miR-11988	bta_circ_0010200	2
bta-miR-11988	bta_circ_0010202	1
bta-miR-11988	bta_circ_0010276	1
bta-miR-11988	bta_circ_0010384	1
bta-miR-11988	bta_circ_0010450	1
bta-miR-11988	bta_circ_0010465	2
bta-miR-11988	bta_circ_0010623	3
bta-miR-11988	bta_circ_0010929	2
bta-miR-11988	bta_circ_0010954	3
bta-miR-11988	bta_circ_0010955	3
bta-miR-11988	bta_circ_0010956	1
bta-miR-11988	bta_circ_0010967	1
bta-miR-11988	bta_circ_0010988	1
bta-miR-11988	bta_circ_0011002	1
bta-miR-11988	bta_circ_0011016	1
bta-miR-11988	bta_circ_0011054	2
bta-miR-11988	bta_circ_0011112	1
bta-miR-11988	bta_circ_0011119	2
bta-miR-11988	bta_circ_0011213	2
bta-miR-11988	bta_circ_0011215	4
bta-miR-11988	bta_circ_0011245	1
bta-miR-11988	bta_circ_0011263	1
bta-miR-11988	bta_circ_0011273	1
bta-miR-11988	bta_circ_0011274	1
bta-miR-11988	bta_circ_0011296	1
bta-miR-11988	bta_circ_0011297	1
bta-miR-11988	bta_circ_0011298	1
bta-miR-11988	bta_circ_0011300	1
bta-miR-11988	bta_circ_0011301	1
bta-miR-11988	bta_circ_0011302	1
bta-miR-11988	bta_circ_0011329	1
bta-miR-11988	bta_circ_0011330	1
bta-miR-11988	bta_circ_0011393	2
bta-miR-11988	bta_circ_0011448	1
bta-miR-11988	bta_circ_0011491	1
bta-miR-11988	bta_circ_0011500	3
bta-miR-11988	bta_circ_0011506	2
bta-miR-11988	bta_circ_0011510	2
bta-miR-11988	bta_circ_0011512	1
bta-miR-11988	bta_circ_0011517	2
bta-miR-11988	bta_circ_0011527	4
bta-miR-11988	bta_circ_0011537	1
bta-miR-11988	bta_circ_0011538	1
bta-miR-11988	bta_circ_0011563	1
bta-miR-11988	bta_circ_0011564	1
bta-miR-11988	bta_circ_0011613	1
bta-miR-11988	bta_circ_0011614	1
bta-miR-11988	bta_circ_0011695	1
bta-miR-11988	bta_circ_0011706	8
bta-miR-11988	bta_circ_0011710	2
bta-miR-11988	bta_circ_0011746	2
bta-miR-11988	bta_circ_0011756	4
bta-miR-11988	bta_circ_0011757	4
bta-miR-11988	bta_circ_0011797	2
bta-miR-11988	bta_circ_0011798	3
bta-miR-11988	bta_circ_0011799	1
bta-miR-11988	bta_circ_0011886	1
bta-miR-11988	bta_circ_0011997	1
bta-miR-11988	bta_circ_0012157	2
bta-miR-11988	bta_circ_0012280	1
bta-miR-11988	bta_circ_0012281	1
bta-miR-11988	bta_circ_0012287	1
bta-miR-11988	bta_circ_0012359	1
bta-miR-11988	bta_circ_0012360	3
bta-miR-11988	bta_circ_0012370	2
bta-miR-11988	bta_circ_0012371	5
bta-miR-11988	bta_circ_0012372	1
bta-miR-11988	bta_circ_0012375	3
bta-miR-11988	bta_circ_0012478	3
bta-miR-11988	bta_circ_0012481	6
bta-miR-11988	bta_circ_0012482	1
bta-miR-11988	bta_circ_0012483	3
bta-miR-11988	bta_circ_0012486	1
bta-miR-11988	bta_circ_0012507	4
bta-miR-11988	bta_circ_0012508	3
bta-miR-11988	bta_circ_0012509	3
bta-miR-11988	bta_circ_0012510	4
bta-miR-11988	bta_circ_0012511	4
bta-miR-11988	bta_circ_0012522	1
bta-miR-11988	bta_circ_0012661	1
bta-miR-11988	bta_circ_0012662	1
bta-miR-11988	bta_circ_0012842	1
bta-miR-11988	bta_circ_0012843	1
bta-miR-11988	bta_circ_0012905	1
bta-miR-11988	bta_circ_0012906	1
bta-miR-11988	bta_circ_0012916	1
bta-miR-11988	bta_circ_0012942	2
bta-miR-11988	bta_circ_0012952	2
bta-miR-11988	bta_circ_0013064	1
bta-miR-11988	bta_circ_0013123	1
bta-miR-11988	bta_circ_0013180	1
bta-miR-11988	bta_circ_0013220	2
bta-miR-11988	bta_circ_0013270	2
bta-miR-11988	bta_circ_0013272	2
bta-miR-11988	bta_circ_0013273	1
bta-miR-11988	bta_circ_0013414	3
bta-miR-11988	bta_circ_0013446	1
bta-miR-11988	bta_circ_0013450	1
bta-miR-11988	bta_circ_0013452	1
bta-miR-11988	bta_circ_0013453	1
bta-miR-11988	bta_circ_0013509	1
bta-miR-11988	bta_circ_0013524	1
bta-miR-11988	bta_circ_0013527	1
bta-miR-11988	bta_circ_0013645	6
bta-miR-11988	bta_circ_0013663	2
bta-miR-11988	bta_circ_0013804	1
bta-miR-11988	bta_circ_0013805	2
bta-miR-11988	bta_circ_0013956	1
bta-miR-11988	bta_circ_0014023	1
bta-miR-11988	bta_circ_0014025	1
bta-miR-11988	bta_circ_0014069	1
bta-miR-11988	bta_circ_0014070	1
bta-miR-11988	bta_circ_0014114	1
bta-miR-11988	bta_circ_0014229	2
bta-miR-11988	bta_circ_0014238	1
bta-miR-11988	bta_circ_0014242	4
bta-miR-11988	bta_circ_0014279	2
bta-miR-11988	bta_circ_0014304	3
bta-miR-11988	bta_circ_0014330	1
bta-miR-11988	bta_circ_0014332	1
bta-miR-11988	bta_circ_0014356	3
bta-miR-11988	bta_circ_0014357	2
bta-miR-11988	bta_circ_0014364	3
bta-miR-11988	bta_circ_0014367	2
bta-miR-11988	bta_circ_0014377	4
bta-miR-11988	bta_circ_0014378	4
bta-miR-11988	bta_circ_0014407	1
bta-miR-11988	bta_circ_0014408	2
bta-miR-11988	bta_circ_0014425	4
bta-miR-11988	bta_circ_0014431	1
bta-miR-11988	bta_circ_0014433	1
bta-miR-11988	bta_circ_0014447	7
bta-miR-11988	bta_circ_0014449	1
bta-miR-11988	bta_circ_0014458	2
bta-miR-11988	bta_circ_0014594	1
bta-miR-11988	bta_circ_0014595	2
bta-miR-11988	bta_circ_0014605	3
bta-miR-11988	bta_circ_0014606	5
bta-miR-11988	bta_circ_0014607	4
bta-miR-11988	bta_circ_0014627	1
bta-miR-11988	bta_circ_0014628	1
bta-miR-11988	bta_circ_0014629	8
bta-miR-11988	bta_circ_0014633	8
bta-miR-11988	bta_circ_0014635	3
bta-miR-11989	bta_circ_0004999	1
bta-miR-11989	bta_circ_0005000	1
bta-miR-11989	bta_circ_0005001	1
bta-miR-11989	bta_circ_0007533	1
bta-miR-11989	bta_circ_0008960	1
bta-miR-11989	bta_circ_0010708	1
bta-miR-11989	bta_circ_0013645	1
bta-miR-11990	bta_circ_0000012	1
bta-miR-11990	bta_circ_0000013	1
bta-miR-11990	bta_circ_0006935	1
bta-miR-11990	bta_circ_0006936	1
bta-miR-11990	bta_circ_0009838	1
bta-miR-11990	bta_circ_0010040	1
bta-miR-11991	bta_circ_0003561	1
bta-miR-11991	bta_circ_0011945	1
bta-miR-11991	bta_circ_0012119	1
bta-miR-11992	bta_circ_0000533	1
bta-miR-11995	bta_circ_0007264	1
bta-miR-11996	bta_circ_0002247	1
bta-miR-11996	bta_circ_0002570	1
bta-miR-11996	bta_circ_0002571	1
bta-miR-11996	bta_circ_0002572	1
bta-miR-11996	bta_circ_0002575	1
bta-miR-11998	bta_circ_0003541	1
bta-miR-11998	bta_circ_0006111	1
bta-miR-11998	bta_circ_0006452	1
bta-miR-11998	bta_circ_0011451	1
bta-miR-11999	bta_circ_0009284	1
bta-miR-11999	bta_circ_0009286	1
bta-miR-11999	bta_circ_0009287	1
bta-miR-12000	bta_circ_0004258	1
bta-miR-12000	bta_circ_0006237	1
bta-miR-12000	bta_circ_0006986	1
bta-miR-12000	bta_circ_0009515	1
bta-miR-12000	bta_circ_0009516	1
bta-miR-12000	bta_circ_0009816	1
bta-miR-12000	bta_circ_0011365	1
bta-miR-12000	bta_circ_0014425	1
bta-miR-12001	bta_circ_0003357	1
bta-miR-12001	bta_circ_0003358	1
bta-miR-12003	bta_circ_0010590	1
bta-miR-12003	bta_circ_0012507	1
bta-miR-12004	bta_circ_0003171	1
bta-miR-12004	bta_circ_0004026	1
bta-miR-12004	bta_circ_0009902	1
bta-miR-12005	bta_circ_0000385	1
bta-miR-12005	bta_circ_0012053	1
bta-miR-12005	bta_circ_0013713	1
bta-miR-12005	bta_circ_0013715	1
bta-miR-12007	bta_circ_0006015	1
bta-miR-12008	bta_circ_0001030	1
bta-miR-12008	bta_circ_0002208	1
bta-miR-12008	bta_circ_0002209	1
bta-miR-12008	bta_circ_0002496	1
bta-miR-12008	bta_circ_0004233	1
bta-miR-12008	bta_circ_0004235	1
bta-miR-12008	bta_circ_0004236	1
bta-miR-12008	bta_circ_0004237	1
bta-miR-12008	bta_circ_0004468	1
bta-miR-12008	bta_circ_0004596	1
bta-miR-12008	bta_circ_0004597	1
bta-miR-12008	bta_circ_0004598	1
bta-miR-12008	bta_circ_0005715	1
bta-miR-12008	bta_circ_0006253	1
bta-miR-12008	bta_circ_0006255	1
bta-miR-12008	bta_circ_0006256	1
bta-miR-12008	bta_circ_0006692	1
bta-miR-12008	bta_circ_0008018	1
bta-miR-12008	bta_circ_0008766	1
bta-miR-12008	bta_circ_0008767	1
bta-miR-12008	bta_circ_0008768	1
bta-miR-12008	bta_circ_0009565	1
bta-miR-12008	bta_circ_0013950	1
bta-miR-12008	bta_circ_0014454	1
bta-miR-12009	bta_circ_0013147	1
bta-miR-12010	bta_circ_0004514	1
bta-miR-12010	bta_circ_0005703	1
bta-miR-12010	bta_circ_0006830	1
bta-miR-12010	bta_circ_0008147	1
bta-miR-12010	bta_circ_0008220	1
bta-miR-12010	bta_circ_0008270	1
bta-miR-12010	bta_circ_0011775	1
bta-miR-12010	bta_circ_0013446	1
bta-miR-12010	bta_circ_0013450	1
bta-miR-12010	bta_circ_0013452	1
bta-miR-12011	bta_circ_0002742	1
bta-miR-12011	bta_circ_0002743	1
bta-miR-12011	bta_circ_0005364	1
bta-miR-12011	bta_circ_0013369	1
bta-miR-12012	bta_circ_0005437	1
bta-miR-12012	bta_circ_0006459	1
bta-miR-12013	bta_circ_0003390	1
bta-miR-12013	bta_circ_0006806	1
bta-miR-12013	bta_circ_0006807	1
bta-miR-12013	bta_circ_0006813	1
bta-miR-12013	bta_circ_0006814	1
bta-miR-12013	bta_circ_0006815	1
bta-miR-12013	bta_circ_0010455	1
bta-miR-12016	bta_circ_0000109	1
bta-miR-12016	bta_circ_0000110	1
bta-miR-12016	bta_circ_0000111	1
bta-miR-12016	bta_circ_0003708	1
bta-miR-12016	bta_circ_0004366	1
bta-miR-12016	bta_circ_0005229	1
bta-miR-12016	bta_circ_0005230	1
bta-miR-12016	bta_circ_0005326	1
bta-miR-12016	bta_circ_0005495	1
bta-miR-12016	bta_circ_0005497	1
bta-miR-12016	bta_circ_0005845	1
bta-miR-12016	bta_circ_0005985	1
bta-miR-12016	bta_circ_0007232	1
bta-miR-12016	bta_circ_0007995	1
bta-miR-12016	bta_circ_0011215	1
bta-miR-12016	bta_circ_0012370	1
bta-miR-12016	bta_circ_0012371	2
bta-miR-12016	bta_circ_0012372	1
bta-miR-12016	bta_circ_0012375	1
bta-miR-12016	bta_circ_0014628	1
bta-miR-12017	bta_circ_0000267	1
bta-miR-12017	bta_circ_0001487	1
bta-miR-12017	bta_circ_0001488	1
bta-miR-12017	bta_circ_0003057	1
bta-miR-12017	bta_circ_0003058	1
bta-miR-12017	bta_circ_0011072	1
bta-miR-12017	bta_circ_0011073	1
bta-miR-12017	bta_circ_0011074	1
bta-miR-12017	bta_circ_0012793	1
bta-miR-12017	bta_circ_0014230	1
bta-miR-12017	bta_circ_0014231	1
bta-miR-12018	bta_circ_0000110	1
bta-miR-12018	bta_circ_0000111	1
bta-miR-12018	bta_circ_0000119	1
bta-miR-12018	bta_circ_0000120	1
bta-miR-12019	bta_circ_0002580	1
bta-miR-12019	bta_circ_0004737	1
bta-miR-12021	bta_circ_0004904	1
bta-miR-12022	bta_circ_0000154	1
bta-miR-12022	bta_circ_0000155	1
bta-miR-12022	bta_circ_0000156	1
bta-miR-12022	bta_circ_0000507	1
bta-miR-12022	bta_circ_0000778	1
bta-miR-12022	bta_circ_0001027	1
bta-miR-12022	bta_circ_0001030	1
bta-miR-12022	bta_circ_0002331	1
bta-miR-12022	bta_circ_0003024	1
bta-miR-12022	bta_circ_0003055	1
bta-miR-12022	bta_circ_0003173	2
bta-miR-12022	bta_circ_0004026	1
bta-miR-12022	bta_circ_0004346	1
bta-miR-12022	bta_circ_0004547	1
bta-miR-12022	bta_circ_0004941	2
bta-miR-12022	bta_circ_0005047	1
bta-miR-12022	bta_circ_0005792	1
bta-miR-12022	bta_circ_0006035	1
bta-miR-12022	bta_circ_0006329	2
bta-miR-12022	bta_circ_0006806	1
bta-miR-12022	bta_circ_0006807	1
bta-miR-12022	bta_circ_0006809	1
bta-miR-12022	bta_circ_0006810	1
bta-miR-12022	bta_circ_0006811	1
bta-miR-12022	bta_circ_0006812	1
bta-miR-12022	bta_circ_0006813	1
bta-miR-12022	bta_circ_0006814	1
bta-miR-12022	bta_circ_0006991	2
bta-miR-12022	bta_circ_0006992	2
bta-miR-12022	bta_circ_0008220	1
bta-miR-12022	bta_circ_0009516	1
bta-miR-12022	bta_circ_0009622	1
bta-miR-12022	bta_circ_0009913	1
bta-miR-12022	bta_circ_0011515	1
bta-miR-12022	bta_circ_0011832	1
bta-miR-12022	bta_circ_0011960	1
bta-miR-12022	bta_circ_0012522	1
bta-miR-12022	bta_circ_0013187	1
bta-miR-12022	bta_circ_0013805	1
bta-miR-12022	bta_circ_0013956	1
bta-miR-12022	bta_circ_0014242	1
bta-miR-12022	bta_circ_0014425	1
bta-miR-12022	bta_circ_0014629	2
bta-miR-12022	bta_circ_0014633	1
bta-miR-12031	bta_circ_0005341	1
bta-miR-12031	bta_circ_0005342	1
bta-miR-12031	bta_circ_0005343	1
bta-miR-12032	bta_circ_0000288	1
bta-miR-12032	bta_circ_0005832	1
bta-miR-12032	bta_circ_0006129	1
bta-miR-12032	bta_circ_0007415	1
bta-miR-12032	bta_circ_0007871	1
bta-miR-12032	bta_circ_0009549	1
bta-miR-12032	bta_circ_0009594	1
bta-miR-12032	bta_circ_0010074	1
bta-miR-12032	bta_circ_0010199	1
bta-miR-12032	bta_circ_0010200	1
bta-miR-12032	bta_circ_0010929	1
bta-miR-12032	bta_circ_0011527	1
bta-miR-12032	bta_circ_0011561	1
bta-miR-12032	bta_circ_0011706	1
bta-miR-12032	bta_circ_0011710	1
bta-miR-12032	bta_circ_0011797	1
bta-miR-12032	bta_circ_0011798	1
bta-miR-12032	bta_circ_0013180	1
bta-miR-12032	bta_circ_0014194	1
bta-miR-12032	bta_circ_0014358	1
bta-miR-12032	bta_circ_0014629	1
bta-miR-12033	bta_circ_0006935	1
bta-miR-12033	bta_circ_0006936	1
bta-miR-12033	bta_circ_0011714	1
bta-miR-12033	bta_circ_0011715	1
bta-miR-12033	bta_circ_0011716	1
bta-miR-12033	bta_circ_0011717	1
bta-miR-12033	bta_circ_0013663	1
bta-miR-12034	bta_circ_0009192	1
bta-miR-12035	bta_circ_0009878	1
bta-miR-12035	bta_circ_0011571	1
bta-miR-12037	bta_circ_0009598	1
bta-miR-12037	bta_circ_0011336	1
bta-miR-12038	bta_circ_0004904	1
bta-miR-12038	bta_circ_0006494	1
bta-miR-12038	bta_circ_0010596	1
bta-miR-12039	bta_circ_0004904	1
bta-miR-12039	bta_circ_0012601	1
bta-miR-12040	bta_circ_0008988	1
bta-miR-12041	bta_circ_0005987	1
bta-miR-12041	bta_circ_0008220	1
bta-miR-12041	bta_circ_0009562	1
bta-miR-12041	bta_circ_0011527	1
bta-miR-12041	bta_circ_0011537	1
bta-miR-12041	bta_circ_0011538	1
bta-miR-12042	bta_circ_0001651	1
bta-miR-12042	bta_circ_0002555	1
bta-miR-12042	bta_circ_0008397	1
bta-miR-12042	bta_circ_0008418	1
bta-miR-12042	bta_circ_0009108	1
bta-miR-12042	bta_circ_0009113	1
bta-miR-12042	bta_circ_0009114	1
bta-miR-12042	bta_circ_0009116	1
bta-miR-12042	bta_circ_0009117	1
bta-miR-12042	bta_circ_0009118	1
bta-miR-12042	bta_circ_0009119	1
bta-miR-12042	bta_circ_0009120	1
bta-miR-12042	bta_circ_0009121	1
bta-miR-12042	bta_circ_0009122	1
bta-miR-12042	bta_circ_0009123	1
bta-miR-12042	bta_circ_0010625	1
bta-miR-12042	bta_circ_0010853	1
bta-miR-12042	bta_circ_0010854	1
bta-miR-12042	bta_circ_0010855	1
bta-miR-12042	bta_circ_0010857	1
bta-miR-12042	bta_circ_0010859	1
bta-miR-12042	bta_circ_0010860	1
bta-miR-12042	bta_circ_0010861	1
bta-miR-12042	bta_circ_0010862	1
bta-miR-12042	bta_circ_0010863	1
bta-miR-12042	bta_circ_0010864	1
bta-miR-12042	bta_circ_0010865	1
bta-miR-12042	bta_circ_0010867	1
bta-miR-12042	bta_circ_0010869	1
bta-miR-12042	bta_circ_0010870	1
bta-miR-12042	bta_circ_0010871	1
bta-miR-12042	bta_circ_0010872	1
bta-miR-12042	bta_circ_0010873	1
bta-miR-12042	bta_circ_0010874	1
bta-miR-12042	bta_circ_0010875	1
bta-miR-12042	bta_circ_0010876	1
bta-miR-12042	bta_circ_0010877	1
bta-miR-12042	bta_circ_0010878	1
bta-miR-12042	bta_circ_0010879	1
bta-miR-12042	bta_circ_0010880	1
bta-miR-12042	bta_circ_0011646	1
bta-miR-12042	bta_circ_0011647	1
bta-miR-12042	bta_circ_0011648	1
bta-miR-12043	bta_circ_0004737	1
bta-miR-12044	bta_circ_0011714	1
bta-miR-12044	bta_circ_0011715	1
bta-miR-12044	bta_circ_0011716	1
bta-miR-12044	bta_circ_0011717	1
bta-miR-12045	bta_circ_0011952	1
bta-miR-12045	bta_circ_0012942	1
bta-miR-12046	bta_circ_0005432	1
bta-miR-12046	bta_circ_0009269	1
bta-miR-12046	bta_circ_0009270	1
bta-miR-12046	bta_circ_0009271	1
bta-miR-12046	bta_circ_0009273	1
bta-miR-12046	bta_circ_0011563	1
bta-miR-12046	bta_circ_0011564	1
bta-miR-12048	bta_circ_0000528	1
bta-miR-12048	bta_circ_0003292	1
bta-miR-12048	bta_circ_0004999	1
bta-miR-12048	bta_circ_0005000	1
bta-miR-12048	bta_circ_0005001	1
bta-miR-12048	bta_circ_0005043	1
bta-miR-12048	bta_circ_0005044	1
bta-miR-12048	bta_circ_0005923	1
bta-miR-12048	bta_circ_0007175	1
bta-miR-12048	bta_circ_0012833	1
bta-miR-12048	bta_circ_0014114	1
bta-miR-12048	bta_circ_0014407	1
bta-miR-12050	bta_circ_0000993	1
bta-miR-12050	bta_circ_0004332	1
bta-miR-12051	bta_circ_0008119	1
bta-miR-12051	bta_circ_0008122	1
bta-miR-12051	bta_circ_0008123	1
bta-miR-12051	bta_circ_0009296	1
bta-miR-12051	bta_circ_0013956	1
bta-miR-12052	bta_circ_0006068	1
bta-miR-12055	bta_circ_0002866	1
bta-miR-12055	bta_circ_0002867	1
bta-miR-12055	bta_circ_0003161	1
bta-miR-12055	bta_circ_0003162	1
bta-miR-12056	bta_circ_0000720	1
bta-miR-12056	bta_circ_0011527	1
bta-miR-12056	bta_circ_0011538	1
bta-miR-12056	bta_circ_0014114	1
bta-miR-12056	bta_circ_0014230	1
bta-miR-12056	bta_circ_0014231	1
bta-miR-12057	bta_circ_0005647	1
bta-miR-12057	bta_circ_0008397	1
bta-miR-12057	bta_circ_0010874	1
bta-miR-12057	bta_circ_0010882	1
bta-miR-12057	bta_circ_0010890	1
bta-miR-12057	bta_circ_0010896	1
bta-miR-12058	bta_circ_0000310	1
bta-miR-12058	bta_circ_0005938	1
bta-miR-12058	bta_circ_0005940	1
bta-miR-12058	bta_circ_0005941	1
bta-miR-12058	bta_circ_0005942	1
bta-miR-12058	bta_circ_0010089	1
bta-miR-12058	bta_circ_0010091	1
bta-miR-12058	bta_circ_0010093	1
bta-miR-12058	bta_circ_0010094	1
bta-miR-12058	bta_circ_0010095	1
bta-miR-12058	bta_circ_0011515	1
bta-miR-12059	bta_circ_0008397	1
bta-miR-12059	bta_circ_0008418	1
bta-miR-12059	bta_circ_0010007	1
bta-miR-12059	bta_circ_0014408	1
bta-miR-12059	bta_circ_0014605	2
bta-miR-12059	bta_circ_0014606	2
bta-miR-12059	bta_circ_0014607	2
bta-miR-12060	bta_circ_0000012	1
bta-miR-12060	bta_circ_0000013	1
bta-miR-12060	bta_circ_0005007	1
bta-miR-12060	bta_circ_0005295	1
bta-miR-12060	bta_circ_0005968	1
bta-miR-12060	bta_circ_0005969	1
bta-miR-12060	bta_circ_0006384	1
bta-miR-12060	bta_circ_0010995	1
bta-miR-12060	bta_circ_0013050	1
bta-miR-12063	bta_circ_0000154	1
bta-miR-12063	bta_circ_0000155	1
bta-miR-12063	bta_circ_0000156	1
bta-miR-12063	bta_circ_0000890	1
bta-miR-12063	bta_circ_0003675	1
bta-miR-12063	bta_circ_0004332	1
bta-miR-12063	bta_circ_0004388	1
bta-miR-12063	bta_circ_0004389	1
bta-miR-12063	bta_circ_0005185	2
bta-miR-12063	bta_circ_0005437	1
bta-miR-12063	bta_circ_0006129	1
bta-miR-12063	bta_circ_0006322	1
bta-miR-12063	bta_circ_0006323	1
bta-miR-12063	bta_circ_0006366	1
bta-miR-12063	bta_circ_0007100	1
bta-miR-12063	bta_circ_0007101	1
bta-miR-12063	bta_circ_0008300	1
bta-miR-12063	bta_circ_0008952	1
bta-miR-12063	bta_circ_0009089	1
bta-miR-12063	bta_circ_0011371	1
bta-miR-12063	bta_circ_0011832	1
bta-miR-12063	bta_circ_0012941	3
bta-miR-12063	bta_circ_0012942	4
bta-miR-12063	bta_circ_0013180	1
bta-miR-12063	bta_circ_0013805	1
bta-miR-12063	bta_circ_0014069	1
bta-miR-12063	bta_circ_0014070	1
bta-miR-12063	bta_circ_0014425	1
bta-miR-12063	bta_circ_0014629	1
bta-miR-12064	bta_circ_0004052	1
bta-miR-122	bta_circ_0010202	1
bta-miR-122	bta_circ_0011215	1
bta-miR-122	bta_circ_0013733	1
bta-miR-122	bta_circ_0013736	1
bta-miR-1247-5p	bta_circ_0004074	1
bta-miR-1248	bta_circ_0000180	1
bta-miR-1248	bta_circ_0000181	1
bta-miR-1248	bta_circ_0001298	1
bta-miR-1248	bta_circ_0004779	1
bta-miR-1248	bta_circ_0004780	1
bta-miR-1248	bta_circ_0004781	1
bta-miR-1248	bta_circ_0004782	1
bta-miR-1248	bta_circ_0004783	1
bta-miR-1248	bta_circ_0004784	1
bta-miR-1248	bta_circ_0004785	1
bta-miR-1248	bta_circ_0004786	1
bta-miR-1248	bta_circ_0005345	1
bta-miR-1248	bta_circ_0005821	1
bta-miR-1248	bta_circ_0005822	1
bta-miR-1248	bta_circ_0006253	1
bta-miR-1248	bta_circ_0006806	1
bta-miR-1248	bta_circ_0006807	1
bta-miR-1248	bta_circ_0006809	1
bta-miR-1248	bta_circ_0006810	1
bta-miR-1248	bta_circ_0006811	1
bta-miR-1248	bta_circ_0006812	1
bta-miR-1248	bta_circ_0006813	1
bta-miR-1248	bta_circ_0006814	1
bta-miR-1248	bta_circ_0009199	1
bta-miR-1248	bta_circ_0010962	1
bta-miR-1248	bta_circ_0010999	1
bta-miR-1248	bta_circ_0011263	1
bta-miR-1248	bta_circ_0011265	1
bta-miR-1248	bta_circ_0011266	1
bta-miR-1248	bta_circ_0011267	1
bta-miR-1248	bta_circ_0011268	1
bta-miR-1248	bta_circ_0011342	1
bta-miR-1248	bta_circ_0012836	1
bta-miR-1248	bta_circ_0013321	1
bta-miR-124a	bta_circ_0007304	1
bta-miR-124b	bta_circ_0007304	1
bta-miR-1256	bta_circ_0005906	1
bta-miR-125a	bta_circ_0002572	1
bta-miR-125a	bta_circ_0003092	1
bta-miR-125a	bta_circ_0012108	1
bta-miR-125a	bta_circ_0012510	1
bta-miR-125a	bta_circ_0012511	1
bta-miR-125a	bta_circ_0013829	1
bta-miR-1264	bta_circ_0009284	1
bta-miR-1264	bta_circ_0009690	1
bta-miR-1264	bta_circ_0009692	1
bta-miR-1264	bta_circ_0011273	1
bta-miR-1264	bta_circ_0011274	1
bta-miR-1264	bta_circ_0012373	1
bta-miR-1264	bta_circ_0012374	1
bta-miR-1271	bta_circ_0000110	1
bta-miR-1271	bta_circ_0000111	1
bta-miR-1271	bta_circ_0000119	1
bta-miR-1271	bta_circ_0000120	1
bta-miR-1271	bta_circ_0002100	1
bta-miR-1271	bta_circ_0005706	1
bta-miR-1271	bta_circ_0005707	1
bta-miR-1271	bta_circ_0005709	1
bta-miR-1271	bta_circ_0009250	1
bta-miR-1271	bta_circ_0011775	1
bta-miR-1277	bta_circ_0001884	1
bta-miR-128	bta_circ_0008147	1
bta-miR-1284	bta_circ_0006910	1
bta-miR-1291	bta_circ_0005862	1
bta-miR-1291	bta_circ_0005863	1
bta-miR-1291	bta_circ_0005864	1
bta-miR-1291	bta_circ_0007465	1
bta-miR-1291	bta_circ_0007466	1
bta-miR-1291	bta_circ_0011669	1
bta-miR-1291	bta_circ_0011670	1
bta-miR-1291	bta_circ_0013284	1
bta-miR-1291	bta_circ_0013285	1
bta-miR-1296	bta_circ_0003169	1
bta-miR-1296	bta_circ_0010653	1
bta-miR-1301	bta_circ_0000532	1
bta-miR-1301	bta_circ_0002154	1
bta-miR-1306	bta_circ_0010408	1
bta-miR-132	bta_circ_0004778	1
bta-miR-132	bta_circ_0004779	1
bta-miR-132	bta_circ_0004780	1
bta-miR-132	bta_circ_0004781	1
bta-miR-132	bta_circ_0004782	1
bta-miR-132	bta_circ_0004783	1
bta-miR-132	bta_circ_0004784	1
bta-miR-132	bta_circ_0011072	1
bta-miR-132	bta_circ_0011073	1
bta-miR-132	bta_circ_0011074	1
bta-miR-133c	bta_circ_0005011	1
bta-miR-133c	bta_circ_0009587	1
bta-miR-133c	bta_circ_0009588	1
bta-miR-134	bta_circ_0009481	1
bta-miR-134	bta_circ_0011643	1
bta-miR-134	bta_circ_0011645	1
bta-miR-134	bta_circ_0011646	1
bta-miR-134	bta_circ_0011647	1
bta-miR-135a	bta_circ_0001751	1
bta-miR-135a	bta_circ_0008394	1
bta-miR-135a	bta_circ_0008396	1
bta-miR-135a	bta_circ_0010074	1
bta-miR-135a	bta_circ_0010708	1
bta-miR-135b	bta_circ_0001428	1
bta-miR-135b	bta_circ_0006806	1
bta-miR-135b	bta_circ_0006807	1
bta-miR-135b	bta_circ_0006809	1
bta-miR-135b	bta_circ_0006810	1
bta-miR-135b	bta_circ_0006811	1
bta-miR-135b	bta_circ_0006812	1
bta-miR-135b	bta_circ_0006813	1
bta-miR-135b	bta_circ_0006814	1
bta-miR-135b	bta_circ_0006815	1
bta-miR-135b	bta_circ_0008394	1
bta-miR-135b	bta_circ_0008396	1
bta-miR-135b	bta_circ_0010074	1
bta-miR-136	bta_circ_0006388	1
bta-miR-136	bta_circ_0009284	1
bta-miR-136	bta_circ_0009286	1
bta-miR-136	bta_circ_0009287	1
bta-miR-136	bta_circ_0012035	1
bta-miR-138	bta_circ_0004331	1
bta-miR-138	bta_circ_0004334	1
bta-miR-138	bta_circ_0004337	1
bta-miR-138	bta_circ_0004338	1
bta-miR-138	bta_circ_0008147	1
bta-miR-1388-3p	bta_circ_0010988	1
bta-miR-139	bta_circ_0009595	1
bta-miR-139	bta_circ_0009596	1
bta-miR-139	bta_circ_0014364	1
bta-miR-140	bta_circ_0010907	1
bta-miR-140	bta_circ_0013284	1
bta-miR-141	bta_circ_0011869	1
bta-miR-141	bta_circ_0011870	1
bta-miR-142-3p	bta_circ_0006692	1
bta-miR-142-3p	bta_circ_0006694	1
bta-miR-142-3p	bta_circ_0006696	1
bta-miR-142-3p	bta_circ_0010708	1
bta-miR-1434-3p	bta_circ_0000507	1
bta-miR-1434-3p	bta_circ_0006111	1
bta-miR-1434-3p	bta_circ_0006114	1
bta-miR-1434-3p	bta_circ_0007893	1
bta-miR-1434-3p	bta_circ_0008397	1
bta-miR-1434-3p	bta_circ_0008418	1
bta-miR-1434-3p	bta_circ_0008912	1
bta-miR-1434-5p	bta_circ_0012988	1
bta-miR-1434-5p	bta_circ_0012989	1
bta-miR-144	bta_circ_0003979	1
bta-miR-145	bta_circ_0002570	1
bta-miR-145	bta_circ_0002571	1
bta-miR-145	bta_circ_0002572	1
bta-miR-145	bta_circ_0007488	1
bta-miR-145	bta_circ_0010577	1
bta-miR-145	bta_circ_0010582	1
bta-miR-145	bta_circ_0012307	1
bta-miR-146a	bta_circ_0000887	1
bta-miR-146a	bta_circ_0002570	1
bta-miR-146a	bta_circ_0002571	1
bta-miR-146a	bta_circ_0002572	1
bta-miR-146a	bta_circ_0004285	1
bta-miR-146a	bta_circ_0004780	1
bta-miR-146a	bta_circ_0004781	1
bta-miR-146a	bta_circ_0004782	1
bta-miR-146a	bta_circ_0004783	1
bta-miR-146a	bta_circ_0004784	1
bta-miR-146a	bta_circ_0004786	1
bta-miR-146a	bta_circ_0004787	1
bta-miR-146a	bta_circ_0004788	1
bta-miR-146a	bta_circ_0004789	1
bta-miR-146a	bta_circ_0004790	1
bta-miR-146a	bta_circ_0004791	1
bta-miR-146a	bta_circ_0004792	1
bta-miR-146a	bta_circ_0004793	1
bta-miR-146a	bta_circ_0004794	1
bta-miR-146a	bta_circ_0004795	1
bta-miR-146a	bta_circ_0004796	1
bta-miR-146a	bta_circ_0005628	1
bta-miR-146a	bta_circ_0014629	1
bta-miR-146a	bta_circ_0014633	1
bta-miR-146b	bta_circ_0001519	1
bta-miR-146b	bta_circ_0004285	1
bta-miR-146b	bta_circ_0004780	1
bta-miR-146b	bta_circ_0004781	1
bta-miR-146b	bta_circ_0004782	1
bta-miR-146b	bta_circ_0004783	1
bta-miR-146b	bta_circ_0004784	1
bta-miR-146b	bta_circ_0004786	1
bta-miR-146b	bta_circ_0004787	1
bta-miR-146b	bta_circ_0004788	1
bta-miR-146b	bta_circ_0004789	1
bta-miR-146b	bta_circ_0004790	1
bta-miR-146b	bta_circ_0004791	1
bta-miR-146b	bta_circ_0004792	1
bta-miR-146b	bta_circ_0004793	1
bta-miR-146b	bta_circ_0004794	1
bta-miR-146b	bta_circ_0004795	1
bta-miR-146b	bta_circ_0004796	1
bta-miR-146b	bta_circ_0005575	1
bta-miR-146b	bta_circ_0005628	1
bta-miR-146b	bta_circ_0008147	1
bta-miR-146b	bta_circ_0008490	1
bta-miR-146b	bta_circ_0012508	1
bta-miR-146b	bta_circ_0012509	1
bta-miR-146b	bta_circ_0012510	1
bta-miR-146b	bta_circ_0012511	1
bta-miR-146b	bta_circ_0014633	1
bta-miR-148b	bta_circ_0000344	1
bta-miR-148b	bta_circ_0000775	1
bta-miR-148b	bta_circ_0002283	1
bta-miR-148b	bta_circ_0002284	1
bta-miR-148b	bta_circ_0002291	1
bta-miR-148b	bta_circ_0011660	1
bta-miR-148b	bta_circ_0012660	1
bta-miR-148b	bta_circ_0012665	1
bta-miR-148b	bta_circ_0012666	1
bta-miR-149-3p	bta_circ_0005283	1
bta-miR-149-3p	bta_circ_0006785	1
bta-miR-149-3p	bta_circ_0006786	1
bta-miR-149-3p	bta_circ_0006787	1
bta-miR-149-3p	bta_circ_0009785	1
bta-miR-149-3p	bta_circ_0010906	1
bta-miR-149-3p	bta_circ_0011365	1
bta-miR-149-3p	bta_circ_0012804	1
bta-miR-149-5p	bta_circ_0000532	1
bta-miR-149-5p	bta_circ_0002682	1
bta-miR-149-5p	bta_circ_0005178	1
bta-miR-149-5p	bta_circ_0007016	1
bta-miR-149-5p	bta_circ_0010273	1
bta-miR-149-5p	bta_circ_0013671	1
bta-miR-150	bta_circ_0001651	1
bta-miR-150	bta_circ_0003649	1
bta-miR-150	bta_circ_0009927	1
bta-miR-150	bta_circ_0011614	1
bta-miR-152	bta_circ_0002283	1
bta-miR-152	bta_circ_0002284	1
bta-miR-152	bta_circ_0002291	1
bta-miR-152	bta_circ_0011660	1
bta-miR-152	bta_circ_0012660	1
bta-miR-152	bta_circ_0012665	1
bta-miR-152	bta_circ_0012666	1
bta-miR-153	bta_circ_0007493	1
bta-miR-153	bta_circ_0007496	1
bta-miR-153	bta_circ_0007497	1
bta-miR-154a	bta_circ_0007652	1
bta-miR-154a	bta_circ_0007653	1
bta-miR-154b	bta_circ_0001048	1
bta-miR-154b	bta_circ_0001314	1
bta-miR-154b	bta_circ_0001319	1
bta-miR-154b	bta_circ_0001320	1
bta-miR-154b	bta_circ_0012047	1
bta-miR-154b	bta_circ_0012048	1
bta-miR-154c	bta_circ_0000190	1
bta-miR-155	bta_circ_0010112	1
bta-miR-1584-3p	bta_circ_0014447	1
bta-miR-1584-3p	bta_circ_0014631	1
bta-miR-15b	bta_circ_0005706	1
bta-miR-15b	bta_circ_0005707	1
bta-miR-15b	bta_circ_0012883	1
bta-miR-1603	bta_circ_0003066	1
bta-miR-1603	bta_circ_0003067	1
bta-miR-1603	bta_circ_0003069	1
bta-miR-1603	bta_circ_0004117	1
bta-miR-16a	bta_circ_0005006	1
bta-miR-16a	bta_circ_0005007	1
bta-miR-17-3p	bta_circ_0012481	1
bta-miR-17-5p	bta_circ_0004170	1
bta-miR-17-5p	bta_circ_0004172	1
bta-miR-17-5p	bta_circ_0006152	1
bta-miR-17-5p	bta_circ_0006564	1
bta-miR-17-5p	bta_circ_0006692	1
bta-miR-17-5p	bta_circ_0006694	1
bta-miR-17-5p	bta_circ_0008218	1
bta-miR-1721	bta_circ_0014238	1
bta-miR-1777a	bta_circ_0003853	1
bta-miR-1777b	bta_circ_0003853	1
bta-miR-1777b	bta_circ_0011215	1
bta-miR-1814a	bta_circ_0003619	1
bta-miR-1814a	bta_circ_0004474	1
bta-miR-1814a	bta_circ_0004644	1
bta-miR-1814a	bta_circ_0004904	1
bta-miR-1814a	bta_circ_0005535	1
bta-miR-1814a	bta_circ_0005536	1
bta-miR-1814a	bta_circ_0005537	1
bta-miR-1814a	bta_circ_0005664	1
bta-miR-1814a	bta_circ_0005781	1
bta-miR-1814a	bta_circ_0005782	1
bta-miR-1814a	bta_circ_0005968	1
bta-miR-1814a	bta_circ_0005969	1
bta-miR-1814a	bta_circ_0006415	1
bta-miR-1814a	bta_circ_0010391	1
bta-miR-1814a	bta_circ_0010625	1
bta-miR-1814c	bta_circ_0001048	1
bta-miR-1814c	bta_circ_0001103	1
bta-miR-1814c	bta_circ_0001159	1
bta-miR-1814c	bta_circ_0001161	1
bta-miR-1814c	bta_circ_0001167	1
bta-miR-1814c	bta_circ_0005824	1
bta-miR-1814c	bta_circ_0005825	1
bta-miR-1814c	bta_circ_0010127	1
bta-miR-1814c	bta_circ_0012226	1
bta-miR-1814c	bta_circ_0012227	1
bta-miR-1814c	bta_circ_0012228	1
bta-miR-1814c	bta_circ_0013956	1
bta-miR-1814c	bta_circ_0014242	1
bta-miR-1814c	bta_circ_0014573	2
bta-miR-181a	bta_circ_0001530	1
bta-miR-181a	bta_circ_0002580	1
bta-miR-181a	bta_circ_0002618	1
bta-miR-181a	bta_circ_0002620	1
bta-miR-181a	bta_circ_0003042	1
bta-miR-181a	bta_circ_0003046	1
bta-miR-181a	bta_circ_0003049	1
bta-miR-181a	bta_circ_0003050	1
bta-miR-181a	bta_circ_0003052	1
bta-miR-181a	bta_circ_0003067	1
bta-miR-181a	bta_circ_0003069	1
bta-miR-181a	bta_circ_0006513	1
bta-miR-181a	bta_circ_0007169	1
bta-miR-181a	bta_circ_0009468	1
bta-miR-181a	bta_circ_0010625	1
bta-miR-181a	bta_circ_0010807	1
bta-miR-181a	bta_circ_0012811	1
bta-miR-181a	bta_circ_0012813	1
bta-miR-181b	bta_circ_0001884	1
bta-miR-181b	bta_circ_0009595	1
bta-miR-181b	bta_circ_0012811	1
bta-miR-181b	bta_circ_0012813	1
bta-miR-181c	bta_circ_0001530	1
bta-miR-181c	bta_circ_0002580	1
bta-miR-181c	bta_circ_0002620	1
bta-miR-181c	bta_circ_0003042	1
bta-miR-181c	bta_circ_0003046	1
bta-miR-181c	bta_circ_0003049	1
bta-miR-181c	bta_circ_0003050	1
bta-miR-181c	bta_circ_0003052	1
bta-miR-181c	bta_circ_0006513	1
bta-miR-181c	bta_circ_0007169	1
bta-miR-181c	bta_circ_0009468	1
bta-miR-181c	bta_circ_0010807	1
bta-miR-181c	bta_circ_0012017	1
bta-miR-181d	bta_circ_0009150	1
bta-miR-181d	bta_circ_0009151	1
bta-miR-181d	bta_circ_0009309	1
bta-miR-181d	bta_circ_0009310	1
bta-miR-181d	bta_circ_0009595	1
bta-miR-182	bta_circ_0003066	1
bta-miR-182	bta_circ_0003067	1
bta-miR-182	bta_circ_0006830	1
bta-miR-182	bta_circ_0006943	1
bta-miR-1835	bta_circ_0005628	1
bta-miR-1835	bta_circ_0013630	1
bta-miR-1835	bta_circ_0013631	1
bta-miR-1839	bta_circ_0009044	1
bta-miR-1839	bta_circ_0011199	1
bta-miR-1839	bta_circ_0013758	1
bta-miR-1839	bta_circ_0014425	1
bta-miR-1839	bta_circ_0014433	1
bta-miR-1843	bta_circ_0007861	1
bta-miR-185	bta_circ_0004489	1
bta-miR-185	bta_circ_0005495	1
bta-miR-185	bta_circ_0005497	1
bta-miR-185	bta_circ_0011451	1
bta-miR-185	bta_circ_0011452	1
bta-miR-185	bta_circ_0011453	1
bta-miR-185	bta_circ_0011454	1
bta-miR-185	bta_circ_0014447	1
bta-miR-185	bta_circ_0014449	1
bta-miR-186	bta_circ_0001048	1
bta-miR-186	bta_circ_0001054	1
bta-miR-186	bta_circ_0001103	1
bta-miR-186	bta_circ_0009199	1
bta-miR-188	bta_circ_0001703	1
bta-miR-188	bta_circ_0001704	1
bta-miR-188	bta_circ_0001705	1
bta-miR-188	bta_circ_0001706	1
bta-miR-188	bta_circ_0001707	1
bta-miR-188	bta_circ_0010518	1
bta-miR-188	bta_circ_0010519	1
bta-miR-188	bta_circ_0012126	1
bta-miR-190a	bta_circ_0009680	1
bta-miR-191	bta_circ_0008785	1
bta-miR-191	bta_circ_0009184	1
bta-miR-191b	bta_circ_0011881	1
bta-miR-192	bta_circ_0008788	1
bta-miR-193b	bta_circ_0006830	1
bta-miR-1949	bta_circ_0009933	1
bta-miR-1949	bta_circ_0009934	1
bta-miR-195	bta_circ_0005006	1
bta-miR-195	bta_circ_0005007	1
bta-miR-196b	bta_circ_0001629	1
bta-miR-196b	bta_circ_0006045	1
bta-miR-196b	bta_circ_0011832	1
bta-miR-197	bta_circ_0008761	1
bta-miR-197	bta_circ_0008762	1
bta-miR-197	bta_circ_0009427	1
bta-miR-199a-3p	bta_circ_0011072	1
bta-miR-199a-3p	bta_circ_0011073	1
bta-miR-199a-3p	bta_circ_0011074	1
bta-miR-199b	bta_circ_0000882	1
bta-miR-199b	bta_circ_0007344	1
bta-miR-199b	bta_circ_0011706	1
bta-miR-199b	bta_circ_0012507	1
bta-miR-199c	bta_circ_0002081	1
bta-miR-199c	bta_circ_0014629	1
bta-miR-19b	bta_circ_0011711	1
bta-miR-200a	bta_circ_0001428	1
bta-miR-200a	bta_circ_0002434	1
bta-miR-200c	bta_circ_0010658	1
bta-miR-200c	bta_circ_0010659	1
bta-miR-200c	bta_circ_0010660	1
bta-miR-206	bta_circ_0001651	1
bta-miR-206	bta_circ_0010874	1
bta-miR-206	bta_circ_0010882	1
bta-miR-206	bta_circ_0010890	1
bta-miR-206	bta_circ_0010896	1
bta-miR-206	bta_circ_0012793	1
bta-miR-208a	bta_circ_0006592	1
bta-miR-208b	bta_circ_0002724	1
bta-miR-208b	bta_circ_0006592	1
bta-miR-20a	bta_circ_0006692	1
bta-miR-20a	bta_circ_0006694	1
bta-miR-20a	bta_circ_0008218	1
bta-miR-20a	bta_circ_0013921	1
bta-miR-20b	bta_circ_0008218	1
bta-miR-21-3p	bta_circ_0007903	1
bta-miR-21-3p	bta_circ_0007904	1
bta-miR-21-5p	bta_circ_0002620	1
bta-miR-21-5p	bta_circ_0009028	1
bta-miR-210	bta_circ_0004941	1
bta-miR-211	bta_circ_0000054	1
bta-miR-211	bta_circ_0002539	1
bta-miR-211	bta_circ_0002844	1
bta-miR-211	bta_circ_0003066	1
bta-miR-211	bta_circ_0003067	1
bta-miR-211	bta_circ_0003069	1
bta-miR-211	bta_circ_0005011	1
bta-miR-211	bta_circ_0005846	1
bta-miR-211	bta_circ_0005848	1
bta-miR-211	bta_circ_0005849	1
bta-miR-211	bta_circ_0008988	1
bta-miR-211	bta_circ_0009108	1
bta-miR-211	bta_circ_0009113	1
bta-miR-211	bta_circ_0009117	1
bta-miR-211	bta_circ_0009120	1
bta-miR-211	bta_circ_0009121	1
bta-miR-211	bta_circ_0009123	1
bta-miR-211	bta_circ_0009124	1
bta-miR-211	bta_circ_0009125	1
bta-miR-211	bta_circ_0009127	1
bta-miR-211	bta_circ_0009785	1
bta-miR-211	bta_circ_0009933	1
bta-miR-211	bta_circ_0009934	1
bta-miR-211	bta_circ_0011714	1
bta-miR-211	bta_circ_0011715	1
bta-miR-211	bta_circ_0011716	1
bta-miR-211	bta_circ_0011717	1
bta-miR-211	bta_circ_0011718	1
bta-miR-212	bta_circ_0005612	1
bta-miR-212	bta_circ_0009680	1
bta-miR-212	bta_circ_0011370	1
bta-miR-214	bta_circ_0003657	1
bta-miR-214	bta_circ_0005283	1
bta-miR-214	bta_circ_0010408	1
bta-miR-214	bta_circ_0014631	1
bta-miR-215	bta_circ_0010066	1
bta-miR-216b	bta_circ_0012003	1
bta-miR-217	bta_circ_0002283	1
bta-miR-217	bta_circ_0002284	1
bta-miR-217	bta_circ_0002291	1
bta-miR-217	bta_circ_0002295	1
bta-miR-217	bta_circ_0002296	1
bta-miR-217	bta_circ_0002297	1
bta-miR-217	bta_circ_0002298	1
bta-miR-217	bta_circ_0005577	1
bta-miR-217	bta_circ_0005579	1
bta-miR-217	bta_circ_0005946	1
bta-miR-217	bta_circ_0012897	1
bta-miR-219b-3p	bta_circ_0004260	1
bta-miR-219b-3p	bta_circ_0004261	1
bta-miR-224	bta_circ_0006494	1
bta-miR-224	bta_circ_0012082	1
bta-miR-224	bta_circ_0012083	1
bta-miR-2284a	bta_circ_0004130	1
bta-miR-2284a	bta_circ_0011215	1
bta-miR-2284aa	bta_circ_0001651	1
bta-miR-2284aa	bta_circ_0002124	1
bta-miR-2284aa	bta_circ_0002125	1
bta-miR-2284aa	bta_circ_0002595	1
bta-miR-2284aa	bta_circ_0004130	1
bta-miR-2284aa	bta_circ_0005524	1
bta-miR-2284aa	bta_circ_0006754	1
bta-miR-2284aa	bta_circ_0008568	1
bta-miR-2284aa	bta_circ_0009449	1
bta-miR-2284aa	bta_circ_0009598	1
bta-miR-2284aa	bta_circ_0009829	1
bta-miR-2284aa	bta_circ_0012481	1
bta-miR-2284aa	bta_circ_0012483	1
bta-miR-2284ab	bta_circ_0004130	1
bta-miR-2284ab	bta_circ_0005906	1
bta-miR-2284ab	bta_circ_0009598	1
bta-miR-2284ac	bta_circ_0004009	1
bta-miR-2284b	bta_circ_0001451	1
bta-miR-2284b	bta_circ_0001651	1
bta-miR-2284b	bta_circ_0003794	1
bta-miR-2284b	bta_circ_0004130	1
bta-miR-2284b	bta_circ_0005229	1
bta-miR-2284b	bta_circ_0005230	1
bta-miR-2284b	bta_circ_0005283	1
bta-miR-2284b	bta_circ_0005380	1
bta-miR-2284b	bta_circ_0006152	2
bta-miR-2284b	bta_circ_0010276	1
bta-miR-2284c	bta_circ_0004130	1
bta-miR-2284c	bta_circ_0005283	1
bta-miR-2284c	bta_circ_0009829	1
bta-miR-2284d	bta_circ_0001651	1
bta-miR-2284d	bta_circ_0004130	1
bta-miR-2284d	bta_circ_0005524	1
bta-miR-2284d	bta_circ_0005706	1
bta-miR-2284d	bta_circ_0005707	1
bta-miR-2284d	bta_circ_0005709	1
bta-miR-2284d	bta_circ_0006152	2
bta-miR-2284d	bta_circ_0006830	1
bta-miR-2284d	bta_circ_0007909	1
bta-miR-2284d	bta_circ_0008568	1
bta-miR-2284d	bta_circ_0008748	1
bta-miR-2284d	bta_circ_0008749	1
bta-miR-2284d	bta_circ_0009082	1
bta-miR-2284d	bta_circ_0009089	1
bta-miR-2284d	bta_circ_0009829	1
bta-miR-2284d	bta_circ_0010276	1
bta-miR-2284d	bta_circ_0011215	1
bta-miR-2284d	bta_circ_0012481	1
bta-miR-2284d	bta_circ_0012483	1
bta-miR-2284d	bta_circ_0012507	1
bta-miR-2284d	bta_circ_0012813	1
bta-miR-2284d	bta_circ_0012818	1
bta-miR-2284d	bta_circ_0012819	1
bta-miR-2284d	bta_circ_0013807	1
bta-miR-2284d	bta_circ_0013956	1
bta-miR-2284d	bta_circ_0014425	1
bta-miR-2284d	bta_circ_0014633	1
bta-miR-2284d	bta_circ_0014635	1
bta-miR-2284e	bta_circ_0001651	1
bta-miR-2284f	bta_circ_0001651	1
bta-miR-2284f	bta_circ_0011282	1
bta-miR-2284h-5p	bta_circ_0006152	1
bta-miR-2284h-5p	bta_circ_0008748	1
bta-miR-2284h-5p	bta_circ_0008749	1
bta-miR-2284j	bta_circ_0005706	1
bta-miR-2284j	bta_circ_0005707	1
bta-miR-2284j	bta_circ_0005709	1
bta-miR-2284j	bta_circ_0006152	1
bta-miR-2284j	bta_circ_0006754	1
bta-miR-2284j	bta_circ_0009089	1
bta-miR-2284j	bta_circ_0012507	1
bta-miR-2284j	bta_circ_0013807	1
bta-miR-2284j	bta_circ_0014425	1
bta-miR-2284k	bta_circ_0008748	1
bta-miR-2284k	bta_circ_0008749	1
bta-miR-2284l	bta_circ_0000700	1
bta-miR-2284l	bta_circ_0008568	1
bta-miR-2284m	bta_circ_0002595	1
bta-miR-2284m	bta_circ_0006378	1
bta-miR-2284m	bta_circ_0006754	1
bta-miR-2284m	bta_circ_0007264	1
bta-miR-2284m	bta_circ_0007827	1
bta-miR-2284m	bta_circ_0008748	1
bta-miR-2284m	bta_circ_0008749	1
bta-miR-2284m	bta_circ_0009601	1
bta-miR-2284n	bta_circ_0005706	1
bta-miR-2284n	bta_circ_0005707	1
bta-miR-2284n	bta_circ_0005709	1
bta-miR-2284n	bta_circ_0006754	1
bta-miR-2284n	bta_circ_0008748	1
bta-miR-2284n	bta_circ_0008749	1
bta-miR-2284n	bta_circ_0009089	1
bta-miR-2284n	bta_circ_0009601	1
bta-miR-2284n	bta_circ_0012481	1
bta-miR-2284n	bta_circ_0012483	1
bta-miR-2284n	bta_circ_0012507	1
bta-miR-2284n	bta_circ_0014425	1
bta-miR-2284o	bta_circ_0011282	1
bta-miR-2284q	bta_circ_0000110	1
bta-miR-2284q	bta_circ_0000111	1
bta-miR-2284q	bta_circ_0000116	1
bta-miR-2284q	bta_circ_0000507	1
bta-miR-2284q	bta_circ_0001651	1
bta-miR-2284q	bta_circ_0005706	1
bta-miR-2284q	bta_circ_0005707	1
bta-miR-2284q	bta_circ_0005709	1
bta-miR-2284q	bta_circ_0006935	1
bta-miR-2284q	bta_circ_0006936	1
bta-miR-2284q	bta_circ_0006937	1
bta-miR-2284q	bta_circ_0008147	1
bta-miR-2284q	bta_circ_0009089	1
bta-miR-2284q	bta_circ_0009353	1
bta-miR-2284q	bta_circ_0009829	1
bta-miR-2284q	bta_circ_0010599	1
bta-miR-2284q	bta_circ_0012507	1
bta-miR-2284q	bta_circ_0013807	1
bta-miR-2284r	bta_circ_0007264	1
bta-miR-2284r	bta_circ_0007827	1
bta-miR-2284r	bta_circ_0007909	1
bta-miR-2284s	bta_circ_0007264	1
bta-miR-2284s	bta_circ_0007827	1
bta-miR-2284s	bta_circ_0007909	1
bta-miR-2284u	bta_circ_0003794	1
bta-miR-2284u	bta_circ_0005706	1
bta-miR-2284u	bta_circ_0005707	1
bta-miR-2284u	bta_circ_0005709	1
bta-miR-2284u	bta_circ_0006152	1
bta-miR-2284u	bta_circ_0008748	1
bta-miR-2284u	bta_circ_0008749	1
bta-miR-2284u	bta_circ_0009089	1
bta-miR-2284u	bta_circ_0009319	1
bta-miR-2284u	bta_circ_0009320	1
bta-miR-2284u	bta_circ_0013807	1
bta-miR-2284v	bta_circ_0000874	1
bta-miR-2284v	bta_circ_0004130	1
bta-miR-2284v	bta_circ_0009829	1
bta-miR-2284v	bta_circ_0014377	1
bta-miR-2284v	bta_circ_0014378	1
bta-miR-2284y	bta_circ_0001651	1
bta-miR-2284y	bta_circ_0004130	1
[truncated: 3,037 more rows]
